# Supplementary material for: Integrated Phytochemical Analysis Based on UPLC-Q-TOF-MS/MS, Network Pharmacology, and Experiment Verification to Explore the Potential Mechanism of Platycodon grandiflorum for Chronic Bronchitis
Source: Front Pharmacol. 2020 Sep 8;11:564131. doi: 10.3389/fphar.2020.564131 (PMC7506058; doi:10.3389/fphar.2020.564131)
Supplement: Supplementary file 1 [file DataSheet_1.xlsx]

## Sheet: Schedule 1
Compound name	Molecular Formula	Source
(1R,2R,3R,5R)-5-(((1R,2R,4R,5S)-5-hydroxy-4-(hydroxymethyl)-2-(isopentylperoxy)cyclohexyl)oxy)-3-(hydroxymethyl)cyclohexane-1,2-diol	C19H36O8	TCMSP
(1S,5R)-3,7,7-trimethylbicyclo[3.1.1]hept-3-ene	C10H16	TCMSP
(2R,3R)-tanxifolin	C15H12O7	SciFinder
16-OXO-platycodin D	C57H90O28	TCMSP
1-methoxy-1,2-butadiene	C5H8O	TCMSP
2,3-dimethyl-1-pentene	C7H14	TCMSP
2'-O-acetyl platycoside D	C59H94O28	SciFinder
2'-O-acetyl platycoside D2	C65H104033	SciFinder
2-cyclopentene-1-undecanoic acid	C16H2802	TCMSP
2-hydroxybicyclo[3.1.1]heptan-6-one	C7H10O2	TCMSP
2'-O-acetyl platycodin D2	C65H104O34	SciFinder
2-O-methyl-3-O-β-D-glucopyranosyl platycogenate A	C38H60O13	TCMSP
2'-O-polygalacin D	C57H92O28	TCMSP
2'-O-polygalacin D2	C63H102O33	TCMSP
3,4-Heptadiene	C7H12	TCMSP
3'-O-acetyl platycoside D	C59H94O28	SciFinder
3'-O-acetyl platycoside D2	C65H104033	SciFinder
3'-a-O-Polygalacin D	C57H92O28	TCMSP
3-ethyl-1,4-hexadiene	C8H14	TCMSP
3-ethyl-cyclohexene	C8H14	TCMSP
3'-O-acetylPlatycodin D2	C65H104O34	TCMSP
3'-O-acetylPlatycodin D2_qt	C30H4807	TCMSP
3-O-a-D-glucopyranosyl platycodigenin methyl ester	C37H60O12	TCMSP
3-O-a-D-glucopyranosyl platycodigenin methyl ester_qt	C31H50O7	TCMSP
3-O-a-gentiobiosyl platycodigenin methyl ester	C43H70O17	TCMSP
3-O-a-Laminaribiosyl platycodigenin methyl ester	C43H70O17	TCMSP
3-O-laminaribiosyl platycodigenin methyl ester	C43H72O17	TCMSP
3-O-laminaribiosyl platycodigenin methyl ester_qt	C31H52O7	TCMSP
3'-O-polygalacin D	C63H100O33	TCMSP
3-O-β-D-glucopyranosyl platycodigenin	C36H58O12	SciFinder
3-O-β-D-glucopyranosyl platycodigenin methyl ester	C37H60O12	TCMSP
3-O-β-D-glucopyranosyl polygalacic acid	C36H58O11	SciFinder
3-O-β-D-glucopyranosyl-2β,12α,16α,23,24-pentahy droxyoleanane-28(13)-lactone	C36H58O13	SciFinder
3-O-β-D-glucopyranosyl-3-β-D-glucopyranosyl-2β,12α,16α,23α-tetrahy droxyoleanane-28(13)-lactone	C42H68O17	SciFinder
3-O-β-D-laminaribiosyl platycodigenin methyl ester	C43H70O17	SciFinder
3-O-β-D-laminaribiosyl polygalacic acid	C42H68O16	SciFinder
3-O-β-gentiobiosyl platycodigenin methyl ester	C43H70O17	TCMSP
5-Hexenoic acid	C6H10O2	TCMSP
Acacetin	C16H12O5	TCMSP
Allyloxyethylene	C5H8O	TCMSP
Apigenin	C15H10O5	SciFinder
Apigetin	C21H20O12	SciFinder
Caffeic acid	C9H8O4	SciFinder
Chlorogenic acid	C16H18O9	SciFinder
Cis-Dihydroquercetin	C15H12O7	TCMSP
Coniferylalcoholestersofoleic acids	C28H44O4	SciFinder
Coniferylalcoholestersofpalmitic	C28H44O4	SciFinder
Crotonaldehyde	C4H6O	TCMSP
Cyclopentenone	C5H6O	TCMSP
Deapio-platyconic acid A lactone	C52H80O25	SciFinder
Deapio-platyconic acid B lactone	C58H90O30	SciFinder
Deapio-platycoside F	C47H76O20	TCMSP
Deapio-platycodin D2	C58H94O29	SciFinder
Deapio-Platycodin D	C52H84O24	TCMSP
Deapio-Platycodin D3	C58H94O29	TCMSP
Deapio-Platycodin E	C64H104O34	TCMSP
Delphinidin3-rutinnoside-7-glucoside	C33H42O16	SciFinder
Dimethyl 2-O-methyl-3-O-a-D-glucopyranosyl platycogenate A	C39H62O13	TCMSP
Dimethyl 3-O-a-D-glucopyranosyl platycogenate A	C38H60O13	TCMSP
Dimethyl 3-O-β-D-glucopyranosyl platycogenate A	C32H50O7	TCMSP
Dimethyl platyconate A	C32H50O8	TCMSP
Dimethyl-2-O-methyl-3-O-β-D-glucopyranosyl platycogenate A	C39H62O13	SciFinder
Ferulic acid	C10H10O4	SciFinder
Flavoplatycoside	C27H32O16	TCMSP
Grandoside	C17H32O11	TCMSP
Inulin	C18H32O16	TCMSP
IPH	C6H6O	TCMSP
Isobutenol	C4H8O	TCMSP
Isopropyl formate	C4H8O2	TCMSP
Latycodigenin	C30H50O7	TCMSP
L-Ile	C6H13NO2	TCMSP
Lobetyol	C14H18O3	TCMSP
Lobetyolin	C20H28O8	TCMSP
Lobetyolinin	C26H38O13	TCMSP
Lobetyolinin_qt	C14H18O3	TCMSP
Luteolin	C15H10O6	TCMSP
Luteolin-7-0-glucoside	C21H20O11	SciFinder
L-Valin	C5H11NO2S	TCMSP
Methy 2-O-methyl Platyconate A	C59H94O30	TCMSP
Methyl (4aR,5R,6aR,6aS,6bR,8aR,9R,10R,11S,12aR,14bS)-5,10,11-trihydroxy-9-(hydroxymethyl)-2,2,6a,6b,9,12a-hexamethyl-1,3,4,5,6,6a,7,8,8a,10,11,12,13,14b-tetradecahydropicene-4a-carboxylate	C31H50O6	TCMSP
Methyl 3-methyl-2-pentenoate	C7H12O2	TCMSP
Methyl 3-O-β-D-glucopyranosyl polygalacate	C37H60O11	TCMSP
Methyl 3-O-β-D-glucopyranosyl polygalacate _qt	C31H50O6	TCMSP
Methyl 3-O-β-laminaribiosyl polygalacate	C44H74016	TCMSP
Methyl (4aR,5R,6aR,6aS,6bR,8aR,10R,11S,12aR,14bS)-5,10,11-trihydroxy-9,9-bis(hydroxymethyl)-2,2,6a,6b,12a-pentamethyl-1,3,4,5,6,6a,7,8,8a,10,11,12,13,14b-tetradecahydropicene-4a-carboxylate	C31H50O7	TCMSP
Methyl 3-O-a-D-glucopyranosyl polygalacate	C37H60O11	TCMSP
Methyl 3-O-a-laminaribiosyl polygalacate	C43H70O16	TCMSP
Methyl 3-O-β-D-laminaribiosyl polygalaeate	C43H70O16	SciFinder
Methyl butyl-1,2-benzenedicarboxylate	C13H16O4	TCMSP
Methyl platycogenate A	C58H92O30	SciFinder
Nicotinic acid	C6H5NO2	TCMSP
Palmitic acid	C16H32O2	TCMSP
Platicodigenin	C30H48O7	TCMSP
Platycodin A	C59H94O29	TCMSP
Platycodin C	C59H94O29	TCMSP
Platycodin D	C57H92O28	TCMSP
Platycodin D2	C63H102O33	TCMSP
Platycodin D3	C63H102O33	TCMSP
Platycodin E	C69H112O38	SciFinder
Platycodins J	C57H90O29	SciFinder
Platycodins K	C59H92O30	SciFinder
Platycodins L	C59H92O30	SciFinder
PlatycodonA	C42H68O16	SciFinder
PlatycodonB	C41H66O15	SciFinder
Platycodonoids A	C29H46O5	SciFinder
Platycodonoids B	C35H56O10	SciFinder
Platycogenic acid A	C30H46O8	TCMSP
Platycogenic acid A lactone	C30H44O8	SciFinder
Platycogenic acid B	C30H46O8	TCMSP
Platycogenic acid C	C30H48O6	TCMSP
Platyconate A	C61H98O29	TCMSP
Platyconate A_qt	C31H48O17	TCMSP
Platyconic acid A	C57H90O29	SciFinder
Platyconic acid A methyl ester	C58H92O29	SciFinder
Platyconic acid B	C59H92O30	SciFinder
Platyconic acid B lactone	C63H98O34	SciFinder
Platyconic acid C	C52H82O25	SciFinder
Platyconic acid D	C54H84O26	SciFinder
Platyconic acid E	C58H92O30	SciFinder
Platyconic acid A lactone	C57H88O29	TCMSP
Platyconin	C63H74O37	SciFinder
Platycosaponin A	C42H68O16	SciFinder
Platycoside A	C58H94O29	TCMSP
Platycoside B	C54H86O25	TCMSP
Platycoside C	C54H86O25	TCMSP
Platycoside D	C69H112O37	TCMSP
Platycoside F	C47H76O20	TCMSP
Platycoside G1	C62H98O32	TCMSP
Platycoside G2	C59H96O30	SciFinder
Platycoside G3	C63H102O32	TCMSP
Platycoside K	C42H84O17	SciFinder
Platycoside L	C42H84O17	SciFinder
Platycoside N	C53H86O24	SciFinder
Platycoside O	C53H84O25	SciFinder
Platycoside H	C58H94O28	SciFinder
Platycoside I	C64H104O33	SciFinder
Platycoside J	C52H84O23	SciFinder
Platycoside M-1	C36H54O12	SciFinder
Platycoside M-1 methyl ester	C37H56O12	SciFinder
Platycoside M-2	C47H72O20	SciFinder
Platycoside M-3	C52H80O24	SciFinder
Platycoside E	C69H112O38	TCMSP
Polygalacic acid	C30H48O6	TCMSP
Polygalacin D	C57H92O27	TCMSP
Polygalacin D2	C63H102O32	TCMSP
Quercetin-7-0-glucoside	C21H20O12	SciFinder
Quercetin-7-0-rutinoside	C27H30O16	SciFinder
Robinin	C33H40O19	TCMSP
Spinasterol	C29H48O	TCMSP
Stearic acid	C18H36O2	TCMSP
Stigmastenol	C29H48O	TCMSP
Thiamine	C12H18Cl2N4OS	TCMSP
THZ	C7H5NS	TCMSP
Trochol	C30H50O2	TCMSP
UND	C11H24	TCMSP
Vitamin c	C6H8O6	TCMSP
α-Spinasterol-β-D-glucoside	C34H56O6	TCMSP
α-Spinasterol-β-D-glucoside_qt	C29H48O	TCMSP
α-spinch sterol	C29H48O	SciFinder
β-sitosterol	C29H50O	SciFinder
Palmitic acid	C16H32O2	TCMSP

## Sheet: Schedule 2
NO.	tR/min	Molecular Formula	Molecular weight	ESI-MS	Error (ppm)	Identity	Intensity
1	25.45	C59H92O30	1280.57	1279.56007 [M-H]-	-3	Platycodin K	2051143
2	32.46	C16H32O2	256.24	255.23295 [M-H]-	0.4	palmitic acid	1608147
3	25.04	C59H94O29	1266.59	1265.5808 [M-H]-	-2.5	Platycodin A	1410183
4	14.96	C63H102O33	1386.63	1385.62306 [M-H]-	-3.1	Platycodin D2	1163182
5	11.99	C42H68O16	828.451	827.44346 [M-H]-	-2	3-O-D-laminaribiosyl Polygalacic acid	680071
6	21.18	C63H102O32	1370.64	1369.62815 [M-H]-	-3.2	Polygalacin D2	675427
7	28.18	C39H62O13	738.419	737.41177 [M-H]-	-3.3	dimethyl 2-O-methyl-3-O-a-D-glucopyranosyl platycogenate A	354133
8	14.4	C58H94O29	1254.59	1253.5808 [M-H]-	-3.6	Deapio-platycodin D2	351718
9	24.8	C65H104O34	1428.64	1427.63363 [M-H]-	-2.3	3-O-acetylPlatycodin D2	280458
10	0.93	C6H14N4O2	174.112	175.11895 [M+H]+	-1.1	L(+)-Arginine	229345
11	12.12	C59H96O30	1284.6	1283.59137 [M-H]-	-3.1	Platycoside G2	162069
12	20.6	C30H48O7	520.34	521.34728 [M+H]+	-3	Platycodigenin	125534
13	10.72	C26H38O13	558.231	559.23852 [M+H]+	-2	lobetyolinin	67587
14	29.44	C45H72O16	868.482	869.48931 [M+H]+	1.7	Dioscin	67452
15	14.69	C58H92O30	1268.57	1267.56007 [M-H]-	-3.1	Platyconic acid E	56024

## Sheet: Schedule 3
NO.	Uniprot ID	Gene symbol	Description
1	Q6PD74	AAGAB	Alpha- and gamma-adaptin-binding protein p34
2	P08183	ABCB1	ATP-binding cassette sub-family B member 1
3	P21447	ABCB1A	ATP-binding cassette sub-family B member 1A
4	P33527	ABCC1	ATP-binding cassette sub-family C member 1
5	Q9UNQ0	ABCG2	ATP-binding cassette sub-family G member 2
6	P42684	ABL2	Abelson murine leukemia viral oncogene homolog 2
7	Q13085	ACACA	Acetyl-Coenzyme A carboxylase alpha, ACC-alpha
8	P12821	ACE	Angiotensin-converting enzyme
9	P22303	ACHE	Acetylcholinesterase
10	P21399	ACOC	Cytoplasmic aconitate hydratase
11	P24666	ACP1	Adipocyte acid phosphatase
12	O14672	ADAM10	Disintegrin and metalloproteinase domain-containing protein 10
13	P78536	ADAM17	Disintegrin and metalloproteinase domain-containing protein 17
14	Q08462	ADCY2	ATP pyrophosphate-lyase 2
15	P30542	ADORA1	Adenosine receptor A1
16	P29274	ADORA2A	Adenosine receptor A2a
17	P29275	ADORA2B	Adenosine receptor A2b
18	P0DMS8	ADORA3	Adenosine receptor A3
19	P35348	ADRA1A	Alpha-1A adrenergic receptor
20	P35368	ADRA1B	Alpha-1B adrenergic receptor
21	P08913	ADRA2A	Alpha-2A adrenergic receptor
22	P18089	ADRA2B	Alpha-2B adrenergic receptor
23	P18825	ADRA2C	Alpha-2C adrenergic receptor
24	P07550	ADRB2	Beta-2 adrenergic receptor
25	P35869	AHR	Aryl hydrocarbon receptor
26	O95433	AHSA1	Activator of 90 kDa heat shock protein ATPase homolog 1
27	P15121	AKR1B1	Aldo-keto reductase family 1 member B1
28	O60218	AKR1B10	Aldo-keto reductase family 1 member B10
29	P42330	AKR1C3	Aldo-keto reductase family 1 member C3
30	P17516	AKR1C4	Aldo-keto reductase family 1 member C4
31	P02768	ALBU	Serum albumin
32	P00352	ALDH1A1	Aldehyde dehydrogenase family 1 member A1
33	P05091	ALDH2	Aldehyde dehydrogenase family 2
34	Q9Y673	ALG5	Asparagine-linked glycosylation protein 5 homolog
35	Q9UM73	ALK	Anaplastic lymphoma kinase
36	P18054	ALOX12	Arachidonate 12-lipoxygenase
37	P16050	ALOX15	Arachidonate 15-lipoxygenase
38	O15296	ALOX15B	Arachidonate 15-lipoxygenase B
39	P09917	ALOX5	Arachidonate 5-lipoxygenase
40	P20292	ALOX5AP	Arachidonate 5-lipoxygenase-activating protein
41	P09923	ALPI	Intestinal-type alkaline phosphatase
42	Q01432	AMPD3	AMP deaminase 3
43	P04745	AMY1A	Alpha-amylase 1
44	P04746	AMY2A	Pancreatic alpha-amylase
45	P04083	ANXA1	Annexin A1
46	P12429	ANXA3	Annexin A3
47	P25054	APC	Adenomatous polyposis coli protein
48	P05067	APP	Amyloid-beta precursor protein
49	P10275	AR	Androgen receptor
50	P05089	ARG1	Arginase-1
51	Q14155	ARHG7	Rho guanine nucleotide exchange factor 7
52	Q9NZN5	ARHGC	Rho guanine nucleotide exchange factor 12
53	P15848	ARSB	Arylsulfatase B
54	P18440	ARY1	Arylamine N-acetyltransferase 1
55	Q96QE3	ATAD5	ATPase family AAA domain-containing protein 5
56	Q5SQI0	ATAT1	Alpha-tubulin N-acetyltransferase 1
57	O14965	AURKA	Aurora kinase A
58	Q9NPZ5	B3GA2	Galactosylgalactosylxylosylprotein 3-beta-glucuronosyltransferase 2
59	P56817	BACE1	Beta-secretase 1
60	Q92934	BAD	Bcl2-associated agonist of cell death
61	Q07812	BAX	Apoptosis regulator BAX
62	Q9UIF8	BAZ2B	Bromodomain adjacent to zinc finger domain protein 2B
63	P10415	BCL2	Apoptosis regulator Bcl-2
64	Q07817	BCL2L1	Bcl-2-like protein 1
65	O00512	BCL9	B-cell CLL/lymphoma 9 protein
66	O15392	BIRC5	Baculoviral IAP repeat-containing protein 5
67	P54132	BLM	Bloom syndrome protein
68	P38398	BRCA1	Breast cancer type 1 susceptibility protein
69	Q06187	BTK	Tyrosine-protein kinase BTK
70	P00915	CA1	Carbonic anhydrase 1
71	O43570	CA12	Carbonic anhydrase 12
72	Q8N1Q1	CA13	Carbonic anhydrase 13
73	Q9ULX7	CA14	Carbonic anhydrase 14
74	P00918	CA2	Carbonic anhydrase 2
75	P07451	CA3	Carbonic anhydrase 3
76	P22748	CA4	Carbonic anhydrase 4
77	P35218	CA5A	Carbonic anhydrase 5A
78	Q9Y2D0	CA5B	Carbonic anhydrase 5B
79	P23280	CA6	Carbonic anhydrase 6
80	P43166	CA7	Carbonic anhydrase 7
81	Q16790	CA9	Carbonic anhydrase 9
82	P29466	CASP1	Caspase-1
83	P55212	CASP6	Caspase-6
84	P55210	CASP7	Caspase-7
85	Q14790	CASP8	Caspase-8
86	P55211	CASP9	Caspase-9
87	P07339	CATD	Cathepsin D
88	Q9UI42	CBPA4	Carboxypeptidase A4
89	O75828	CBR3	Carbonyl reductase [NADPH] 3
90	P32239	CCKBR	Gastrin/cholecystokinin type B receptor
91	P14635	CCNB1	G2/mitotic-specific cyclin-B1
92	O95067	CCNB2	G2/mitotic-specific cyclin-B2
93	Q8WWL7	CCNB3	G2/mitotic-specific cyclin-B3
94	P24385	CCND1	G1/S-specific cyclin-D1
95	P30279	CCND2	G1/S-specific cyclin-D2
96	P24864	CCNE1	G1/S-specific cyclin-E1
97	P29016	CD1B	T-cell surface glycoprotein CD1b
98	P20273	CD22	B-cell receptor CD22
99	P28907	CD38	ADP-ribosyl cyclase/cyclic ADP-ribose hydrolase 1
100	P07766	CD3E	T-cell surface glycoprotein CD3 epsilon chain
101	P29965	CD40L	CD40 ligand
102	P29965	CD40LG	CD40 ligand
103	Q15078	CD5R1	Cyclin-dependent kinase 5 activator 1
104	P60033	CD81	CD81 antigen
105	P30304	CDC25A	M-phase inducer phosphatase 1
106	P30305	CDC25B	M-phase inducer phosphatase 2
107	P60953	CDC42	Cell division control protein 42 homolog
108	O00311	CDC7	Cell division cycle 7-related protein kinase
109	P06493	CDK1	Cyclin-dependent kinase 1
110	P24941	CDK2	Cyclin-dependent kinase 2
111	P11802	CDK4	Cyclin-dependent kinase 4
112	Q00535	CDK5	Cyclin-dependent kinase 5
113	Q00534	CDK6	Cyclin-dependent kinase 6
114	P38936	CDKN1A	Cyclin-dependent kinase inhibitor 1
115	P38936	CDN1A	Cyclin-dependent kinase inhibitor 1
116	O00748	CES2	Cocaine esterase
117	O15519	CFLAR	CASP8 and FADD-like apoptosis regulator
118	P13569	CFTR	Cystic fibrosis transmembrane conductance regulator
119	Q96EP1	CHFR	E3 ubiquitin-protein ligase CHFR
120	P11229	CHRM1	Muscarinic acetylcholine receptor M1
121	P08172	CHRM2	Muscarinic acetylcholine receptor M2
122	Q9NZ45	CISD1	CDGSH iron-sulfur domain-containing protein 1
123	Q99967	CITE2	Cbp/p300-interacting transactivator 2
124	P68400	CK2A1	Casein kinase II subunit alpha
125	P19784	CK2A2	Casein kinase II subunit alpha'
126	P49759	CLK1	Dual specificity protein kinase CLK1
127	P49761	CLK3	Dual specificity protein kinase CLK3
128	Q16740	CLPP	ATP-dependent Clp protease proteolytic subunit
129	P23946	CMA1	Chymase
130	P21554	CNR1	Cannabinoid receptor 1
131	Q6VVX0	CP2R1	Vitamin D 25-hydroxylase
132	P22680	CP7A1	Cytochrome P450 7A1
133	Q9UKF6	CPSF3	Cleavage and polyadenylation specificity factor subunit 3
134	O95639	CPSF4	Cleavage and polyadenylation specificity factor subunit 4
135	P67870	CSK2B	Casein kinase II subunit beta
136	P78368	CSNK1G2	Casein kinase I isoform gamma-2
137	P56545	CTBP2	C-terminal-binding protein 2
138	Q9GZU7	CTDSP1	Carboxy-terminal domain RNA polymerase II polypeptide A small phosphatase 1
139	P17538	CTRB1	Chymotrypsinogen B
140	P08311	CTSG	Cathepsin G
141	P04839	CYBB	Cytochrome b558 subunit beta
142	P05093	CYP17A1	Steroid 17-alpha-hydroxylase/17
143	P11511	CYP19A1	Aromatase
144	P04798	CYP1A1	Cytochrome P450 1A1
145	P05177	CYP1A2	Cytochrome P450 1A2
146	Q16678	CYP1B1	Cytochrome P450 1B1
147	O43174	CYP26A1	Cytochrome P450 26A1
148	Q9NR63	CYP26B1	Cytochrome P450 26B1
149	P33261	CYP2C19	Cytochrome P450 2C19
150	P11712	CYP2C9	Cytochrome P450 2C9
151	P10635	CYP2D6	Cytochrome P450 2D6
152	P08684	CYP3A4	Cytochrome P450 3A4
153	Q16850	CYP51A1	Lanosterol 14-alpha demethylase
154	P53355	DAPK1	Death-associated protein kinase 1
155	O43293	DAPK3	Death-associated protein kinase 3
156	Q9UBU7	DBF4	Protein DBF4 homolog A
157	P39656	DDOST	Dolichyl-diphosphooligosaccharide--protein glycosyltransferase 48 kDa subunit
158	O95786	DDX58	Antiviral innate immune response receptor RIG-I
159	P23743	DGKA	Diacylglycerol kinase alpha
160	Q8NBQ5	DHB11	Estradiol 17-beta-dehydrogenase 11
161	P00374	DHFR	Dihydrofolate reductase
162	Q00796	DHSO	Sorbitol dehydrogenase
163	P49895	DIO1	Type I iodothyronine deiodinase
164	P18858	DNLI1	DNA ligase 1
165	Q9UBC3	DNMT3B	DNA (cytosine-5)-methyltransferase 3B
166	P27487	DPP4	Dipeptidyl peptidase 4
167	P14416	DRD2	D(2) dopamine receptor
168	P35462	DRD3	D(3) dopamine receptor
169	Q01094	E2F1	Transcription factor E2F1
170	P42892	ECE1	Endothelin-converting enzyme 1
171	O43324	EEF1E1	Eukaryotic translation elongation factor 1 epsilon-1
172	Q13822	ENPP2	Ectonucleotide pyrophosphatase/phosphodiesterase family member 2
173	Q09472	EP300	Histone acetyltransferase p300
174	P29323	EPHB2	Ephrin type-B receptor 2
175	P04626	ERBB2	Receptor tyrosine-protein kinase erbB-2
176	P48449	ERG7	Lanosterol synthase
177	O75460	ERN1	Serine/threonine-protein kinase/endoribonuclease IRE1
178	P03372	ESR1	Estrogen receptor
179	Q92731	ESR2	Estrogen receptor beta
180	P11474	ESRRA	Steroid hormone receptor ERR1
181	Q01844	EWS	RNA-binding protein EWS
182	P00742	F10	Coagulation factor X
183	P00488	F13A	Coagulation factor XIII A chain
184	P00734	F2	Coagulation factor II
185	P13726	F3	Coagulation factor III
186	P08709	F7	Coagulation factor VII
187	P00740	F9	Coagulation factor IX
188	O00519	FAAH	Fatty-acid amide hydrolase 1
189	P07148	FABP1	Fatty acid-binding protein
190	P12104	FABP2	Fatty acid-binding protein 2
191	P05413	FABP3	Fatty acid-binding protein 3
192	P15090	FABP4	Fatty acid-binding protein 4
193	Q01469	FABP5	Fatty acid-binding protein 5
194	P09467	FBP1	Fructose-1,6-bisphosphatase 1
195	P06734	FCER2	Low affinity immunoglobulin epsilon Fc receptor
196	P37268	FDFT1	Farnesyl-diphosphate farnesyltransferase
197	P39748	FEN1	Flap endonuclease 1
198	P07332	FES	Tyrosine-protein kinase Fes/Fps
199	O14842	FFAR1	Free fatty acid receptor 1
200	Q5NUL3	FFAR4	Free fatty acid receptor 4
201	P05230	FGF1	Fibroblast growth factor 1
202	P09038	FGF2	Fibroblast growth factor 2
203	P36888	FLT3	Receptor-type tyrosine-protein kinase FLT3
204	P02751	FN1	Fibronectin
205	P49354	FNTA	Protein farnesyltransferase/geranylgeranyltransferase type-1 subunit alpha
206	P49356	FNTB	Protein farnesyltransferase subunit beta
207	Q04609	FOLH1	Glutamate carboxypeptidase 2
208	P15328	FOLR1	Folate receptor alpha
209	P01100	FOS	Proto-oncogene c-Fos
210	Q05932	FPGS	Folylpolyglutamate synthase
211	P42345	FRAP	Serine/threonine-protein kinase mTOR
212	Q16595	FXN	Frataxin
213	P54710	FXYD2	Sodium/potassium-transporting ATPase subunit gamma
214	P35575	G6PC	Glucose-6-phosphatase
215	P11413	G6PD	Glucose-6-phosphate 1-dehydrogenase
216	O43292	GAA	Glycosylphosphatidylinositol anchor attachment 1 protein
217	Q9UBS5	GABBR1	Gamma-aminobutyric acid type B receptor subunit 1
218	P14867	GABRA1	Gamma-aminobutyric acid receptor subunit alpha-1
219	P47869	GABRA2	Gamma-aminobutyric acid receptor subunit alpha-2
220	P34903	GABRA3	Gamma-aminobutyric acid receptor subunit alpha-3
221	P48169	GABRA4	Gamma-aminobutyric acid receptor subunit alpha-4
222	P31644	GABRA5	Gamma-aminobutyric acid receptor subunit alpha-5
223	Q16445	GABRA6	Gamma-aminobutyric acid receptor subunit alpha-6
224	P18505	GABRB1	Gamma-aminobutyric acid receptor subunit beta-1
225	P47870	GABRB2	Gamma-aminobutyric acid receptor subunit beta-2
226	P28472	GABRB3	Gamma-aminobutyric acid receptor subunit beta-3
227	O14764	GABRD	Gamma-aminobutyric acid receptor subunit delta
228	P78334	GABRE	Gamma-aminobutyric acid receptor subunit epsilon
229	Q8N1C3	GABRG1	Gamma-aminobutyric acid receptor subunit gamma-1
230	P18507	GABRG2	Gamma-aminobutyric acid receptor subunit gamma-2
231	Q99928	GABRG3	Gamma-aminobutyric acid receptor subunit gamma-3
232	O00591	GABRP	Gamma-aminobutyric acid receptor subunit pi
233	Q9UN88	GABRQ	Gamma-aminobutyric acid receptor subunit theta
234	P22102	GART	Trifunctional purine biosynthetic protein adenosine-3
235	P55040	GEM	GTP-binding protein GEM
236	P55789	GFER	FAD-linked sulfhydryl oxidase ALR
237	P10071	GLI3	Transcriptional activator GLI3
238	Q04760	GLO1	Lactoylglutathione lyase
239	O94925	GLS	Glutaminase kidney isoform
240	P15104	GLUL	Glutamine synthetase
241	P14672	GLUT4	Solute carrier family 2
242	P63096	GNAI1	Guanine nucleotide-binding protein G(i) subunit alpha-1
243	Q8TDU6	GPBAR1	G-protein coupled bile acid receptor 1
244	Q9UPC5	GPR34	Probable G-protein coupled receptor 34
245	Q9HC97	GPR35	Probable G-protein coupled receptor 35
246	P62993	GRB2	Growth factor receptor-bound protein 2
247	P48058	GRIA4	Glutamate receptor 4
248	P39086	GRIK1	Glutamate receptor ionotropic
249	P43250	GRK6	G protein-coupled receptor kinase 6
250	Q14416	GRM2	Metabotropic glutamate receptor 2
251	P49840	GSK3A	Glycogen synthase kinase-3 alpha
252	P49841	GSK3B	Glycogen synthase kinase-3 beta
253	P09488	GSTM1	Glutathione S-transferase Mu 1
254	P28161	GSTM2	Glutathione S-transferase Mu 2
255	P78417	GSTO1	Glutathione S-transferase omega-1
256	P09211	GSTP1	Glutathione S-transferase P
257	P0CG30	GSTT2	Glutathione S-transferase theta-2
258	P08236	GUSB	Beta-glucuronidase
259	Q92819	HAS2	Hyaluronan synthase 2
260	P69905	HBA	Hemoglobin subunit alpha
261	P68871	HBB	Hemoglobin subunit beta
262	Q8TDS4	HCAR2	Hydroxycarboxylic acid receptor 2
263	P08631	HCK	Hematopoietic cell kinase
264	Q13547	HDAC1	Histone deacetylase 1
265	Q969S8	HDAC10	Histone deacetylase 10
266	Q96DB2	HDAC11	Histone deacetylase 11
267	Q92769	HDAC2	Histone deacetylase 2
268	O15379	HDAC3	Histone deacetylase 3
269	P56524	HDAC4	Histone deacetylase 4
270	Q9UQL6	HDAC5	Histone deacetylase 5
271	Q9UBN7	HDAC6	Histone deacetylase 6
272	Q8WUI4	HDAC7	Histone deacetylase 7
273	Q9BY41	HDAC8	Histone deacetylase 8
274	Q9UKV0	HDAC9	Histone deacetylase 9
275	P04233	HG2A	HLA class II histocompatibility antigen gamma chain
276	Q16665	HIF1A	Hypoxia-inducible factor 1-alpha
277	Q9NWT6	HIF1AN	Hypoxia-inducible factor 1-alpha inhibitor
278	P19367	HK1	Hexokinase-1
279	P52789	HK2	Hexokinase-2
280	P13747	HLAE	HLA class I histocompatibility antigen
281	P04035	HMGCR	3-hydroxy-3-methylglutaryl-coenzyme A reductase
282	P09601	HMOX1	Heme oxygenase 1
283	P41235	HNF4A	Hepatocyte nuclear factor 4-alpha
284	P15428	HPGD	15-hydroxyprostaglandin dehydrogenase [NAD(+)]
285	Q9Y251	HPSE	Heparanase
286	P07900	HS90A	Heat shock protein HSP 90-alpha
287	P28845	HSD11B1	Corticosteroid 11-beta-dehydrogenase isozyme 1
288	P80365	HSD11B2	Corticosteroid 11-beta-dehydrogenase isozyme 2
289	P14061	HSD17B1	Estradiol 17-beta-dehydrogenase 1
290	P37059	HSD17B2	Estradiol 17-beta-dehydrogenase 2
291	P07900	HSP90AA1	Heat shock protein HSP 90-alpha 1
292	P08238	HSP90AB1	Heat shock protein HSP 90-beta
293	P04792	HSPB1	Heat shock protein beta-1
294	P41595	HTR2B	5-hydroxytryptamine receptor 2B
295	Q92743	HTRA1	High-temperature requirement A serine peptidase 1
296	Q92826	HXB13	Homeobox protein Hox-B13
297	Q13651	I10R1	Interleukin-10 receptor subunit alpha
298	P18065	IBP2	Insulin-like growth factor-binding protein 2
299	P05362	ICAM1	Intercellular adhesion molecule 1
300	P01579	IFNG	Interferon gamma
301	P08069	IGF1R	Insulin-like growth factor 1 receptor
302	O14920	IKBKB	Inhibitor of nuclear factor kappa-B kinase subunit beta
303	Q9Y6K9	IKBKG	Inhibitor of nuclear factor kappa-B kinase subunit gamma
304	P22301	IL10	Interleukin-10
305	P35225	IL13	Interleukin-13
306	P01584	IL1B	Interleukin-1B
307	P60568	IL2	Interleukin-2
308	P05112	IL4	Interleukin-4
309	P05231	IL6	Interleukin-6
310	P20839	IMPDH1	Inosine-5'-monophosphate dehydrogenase 1
311	P12268	IMPDH2	Inosine-5'-monophosphate dehydrogenase 2
312	P15260	INGR1	Interferon gamma receptor 1
313	P06213	INSR	Insulin receptor
314	P08514	ITGA2B	Integrin alpha-IIb
315	P06756	ITGAV	Integrin alpha-V
316	P05106	ITGB3	Integrin beta-3
317	P18084	ITGB5	Integrin beta-5
318	P18564	ITGB6	Integrin beta-6
319	P05412	JUN	Transcription factor AP-1
320	Q9UQM7	KCC2A	Calcium/calmodulin-dependent protein kinase type II subunit alpha
321	P22001	KCNA3	Potassium voltage-gated channel subfamily A member 3
322	Q14721	KCNB1	Potassium voltage-gated channel subfamily B member 1
323	P57789	KCNK10	Potassium channel subfamily K member 10
324	P06732	KCRM	Creatine kinase M-type
325	Q9Y2K7	KDM2A	Lysine-specific demethylase 2A
326	O75164	KDM4A	Lysine-specific demethylase 4A
327	B2RXH2	KDM4E	Lysine-specific demethylase 4E
328	P06870	KLK1	Kallikrein-1
329	O15229	KMO	Kynurenine 3-monooxygenase
330	Q04759	KPCT	Protein kinase C theta type
331	P28838	LAP3	Cytosol aminopeptidase
332	P17931	LGALS3	Galectin-3
333	P09960	LTA4H	Leukotriene A-4 hydrolase
334	Q15722	LTB4R	Leukotriene B4 receptor 1
335	P20916	MAG	Myelin-associated glycoprotein
336	P21397	MAOA	Monoamine oxidase type A
337	P27338	MAOB	Monoamine oxidase type B
338	P28482	MAPK1	Mitogen-activated protein kinase 1
339	Q16539	MAPK14	Mitogen-activated protein kinase 14
340	P27361	MAPK3	Mitogen-activated protein kinase 3
341	P45983	MAPK8	Mitogen-activated protein kinase 8
342	P10636	MAPT	Microtubule-associated protein tau
343	P42679	MATK	Megakaryocyte-associated tyrosine-protein kinase
344	Q01726	MC1R	Melanocortin receptor 1
345	P32245	MC4R	Melanocortin receptor 4
346	P33032	MC5R	Melanocortin receptor 5
347	Q07820	MCL1	Induced myeloid leukemia cell differentiation protein Mcl-1
348	Q00987	MDM2	E3 ubiquitin-protein ligase Mdm2
349	P08581	MET	Hepatocyte growth factor receptor
350	Q9HBH9	MKNK2	MAP kinase-interacting serine/threonine-protein kinase 2
351	P08473	MME	Neprilysin
352	P03956	MMP1	Matrix metalloproteinase-1
353	P39900	MMP12	Matrix metalloproteinase-12
354	P45452	MMP13	Matrix metalloproteinase-13
355	P08253	MMP2	Matrix metalloproteinase-2
356	P08254	MMP3	Matrix metalloproteinase-3
357	P22894	MMP8	Matrix metalloproteinase-8
358	P14780	MMP9	Matrix metalloproteinase-9
359	P34949	MPI	Mannose-6-phosphate isomerase
360	Q01362	MS4A2	Membrane-spanning 4-domains subfamily A member 2
361	Q06455	MTG8	Protein MTG8
362	Q9Y2A7	NCKP1	Nck-associated protein 1
363	Q15596	NCOA2	Nuclear receptor coactivator 2
364	Q14686	NCOA6	Nuclear receptor coactivator 6
365	Q13232	NDK3	Nucleoside diphosphate kinase 3
366	O94916	NFAT5	Nuclear factor of activated T-cells 5
367	Q16236	NFE2L2	Nuclear factor erythroid 2-related factor 2
368	P19838	NFKB1	Nuclear factor NF-kappa-B p105 subunit
369	Q00653	NFKB2	Nuclear factor NF-kappa-B p100 subunit
370	P25963	NFKBIA	NF-kappa-B inhibitor alpha
371	P08138	NGFR	Tumor necrosis factor receptor superfamily member 16
372	Q9GZQ4	NMUR2	Neuromedin-U receptor 2
373	P35228	NOS2	Nitric oxide synthase type II
374	P29474	NOS3	Nitric oxide synthase type III
375	Q9NPH5	NOX4	NADPH oxidase 4
376	Q9UHC9	NPC1L1	NPC1-like intracellular cholesterol transporter 1
377	Q6W5P4	NPSR1	Neuropeptide S receptor
378	P16083	NQO2	Ribosyldihydronicotinamide dehydrogenase [quinone]
379	P51843	NR0B1	Nuclear receptor subfamily 0 group B member 1
380	Q13133	NR1H3	Oxysterols receptor LXR-alpha
381	Q96RI1	NR1H4	Nuclear receptor subfamily 1 group H member 4
382	O75469	NR1I2	Nuclear receptor subfamily 1 group I member 2
383	Q14994	NR1I3	Nuclear receptor subfamily 1 group I member 3
384	P49116	NR2C2	Nuclear receptor subfamily 2 group C member 2
385	P04150	NR3C1	Nuclear receptor subfamily 3 group C member 1
386	P08235	NR3C2	Nuclear receptor subfamily 3 group C member 2
387	Q9NWW6	NRK1	Nicotinamide riboside kinase 1
388	Q9BZD4	NUF2	Kinetochore protein Nuf2
389	P11926	ODC1	Ornithine decarboxylase
390	P41143	OPRD1	Delta-type opioid receptor-1
391	P41145	OPRK1	Kappa-type opioid receptor-1
392	OXSR1	OPRM1	Mu-type opioid receptor-1
393	O95747	OXSR1	Oxidative stress-responsive 1 protein
394	P68402	PA1B2	Platelet-activating factor acetylhydrolase IB subunit beta
395	Q15102	PAFAH1B3	Platelet-activating factor acetylhydrolase IB subunit gamma
396	Q9P286	PAK5	Serine/threonine-protein kinase PAK 5
397	P09874	PARP1	Poly [ADP-ribose] polymerase 1
398	Q86U86	PBRM1	Protein polybromo-1
399	P12004	PCNA	Proliferating cell nuclear antigen
400	Q08499	PDE4D	cAMP-specific 3',5'-cyclic phosphodiesterase 4D
401	O76074	PDE5A	cGMP-specific 3',5'-cyclic phosphodiesterase
402	Q5SV97	PERM1	PGC-1 and ERR-induced regulator in muscle protein 1
403	Q9H7Z7	PGES2	Prostaglandin E synthase 2
404	P06401	PGR	Progesterone receptor
405	P48736	PIK3CG	Phosphatidylinositol 4,5-bisphosphate 3-kinase catalytic subunit gamma isoform
406	P11309	PIM1	Serine/threonine-protein kinase pim-1
407	Q9P1W9	PIM2	Serine/threonine-protein kinase pim-2
408	P48426	PIP4K2A	Phosphatidylinositol 5-phosphate 4-kinase type-2 alpha
409	P04054	PLA2G1B	Phosphatidylcholine 2-acylhydrolase 1B
410	P47712	PLA2G4A	Phosphatidylcholine 2-acylhydrolase 4A
411	P00749	PLAU	Urokinase-type plasminogen activator, U-plasminogen activator
412	P00747	PLG	Plasminogen
413	P06746	POLB	DNA polymerase beta
414	Q9Y253	POLH	DNA polymerase eta
415	Q9UNA4	POLI	DNA polymerase iota
416	Q9UBT6	POLK	DNA polymerase kappa
417	Q07869	PPARA	Peroxisome proliferator-activated receptor alpha
418	Q03181	PPARD	Peroxisome proliferator-activated receptor delta
419	P37231	PPARG	Peroxisome proliferator-activated receptor gamma
420	Q08209	PPP3CA	Serine/threonine-protein phosphatase 2B catalytic subunit alpha isoform
421	P48147	PREP	Prolyl endopeptidase
422	P17612	PRKACA	cAMP-dependent protein kinase catalytic subunit alpha
423	P17252	PRKCA	Protein kinase C alpha type
424	Q02156	PRKCE	Protein kinase C epsilon type
425	P24723	PRKCH	Protein kinase C eta type
426	O60260	PRKN	E3 ubiquitin-protein ligase parkin
427	P07477	PRSS1	Serine protease 1
428	P35030	PRSS3	Serine protease 3
429	P49810	PSEN2	Presenilin-2
430	O75475	PSIP1	PC4 and SFRS1-interacting protein
431	O43242	PSMD3	26S proteasome non-ATPase regulatory subunit 3
432	Q9Y5Y4	PTGDR2	Prostaglandin D2 receptor 2
433	P34995	PTGER1	Prostaglandin E2 receptor EP1 subtype
434	P43116	PTGER2	Prostaglandin E2 receptor EP2 subtype
435	P35408	PTGER4	Prostaglandin E2 receptor EP4 subtype
436	O14684	PTGES	Prostaglandin E synthase
437	P43119	PTGIR	Prostacyclin receptor
438	P23219	PTGS1	Prostaglandin G/H synthase 1
439	P35354	PTGS2	Prostaglandin G/H synthase 2
440	Q14289	PTK2B	Protein-tyrosine kinase 2-beta
441	P18031	PTPN1	Tyrosine-protein phosphatase non-receptor type 1
442	Q06124	PTPN11	Tyrosine-protein phosphatase non-receptor type 11
443	P17706	PTPN2	Tyrosine-protein phosphatase non-receptor type 2
444	Q9Y2R2	PTPN22	Tyrosine-protein phosphatase non-receptor type 22
445	P29350	PTPN6	Tyrosine-protein phosphatase non-receptor type 6
446	P18433	PTPRA	Receptor-type tyrosine-protein phosphatase alpha, Protein-tyrosine phosphatase alpha
447	P10586	PTPRF	Receptor-type tyrosine-protein phosphatase F
448	Q13332	PTPRS	Receptor-type tyrosine-protein phosphatase S
449	P63000	RAC1	Ras-related C3 botulinum toxin substrate 1
450	Q9H0H5	RACGAP1	Rac GTPase-activating protein 1
451	O95398	RAPGEF3	Rap guanine nucleotide exchange factor 3
452	P10276	RARA	Retinoic acid receptor alpha
453	P10826	RARB	Retinoic acid receptor beta
454	P13631	RARG	Retinoic acid receptor gamma
455	P02753	RBP4	Retinol-binding protein 4
456	Q04206	RELA	Transcription factor p65
457	O14924	RGS12	Regulator of G-protein signaling 12
458	Q9NS28	RGS18	Regulator of G-protein signaling 18
459	P49758	RGS6	Regulator of G-protein signaling 6
460	Q05823	RNASEL	2-5A-dependent ribonuclease
461	P35398	RORA	Nuclear receptor ROR-alpha
462	Q92753	RORB	Nuclear receptor ROR-beta
463	P51449	RORC	Nuclear receptor ROR-gamma
464	P51812	RPS6KA3	Ribosomal protein S6 kinase alpha-3
465	P23921	RRM1	Ribonucleoside-diphosphate reductase large subunit
466	P28702	RXRB	Retinoic acid receptor RXR-beta
467	P48443	RXRG	Retinoid X receptor gamma
468	P25815	S100P	Protein S100-P
469	P06703	S10A6	Protein S100-A6
470	O00767	SCD	Acyl-CoA desaturase
471	Q14524	SCN5A	Sodium channel protein type 5 subunit alpha
472	P16581	SELE	E-selectin
473	P49908	SELP	Selenoprotein P
474	Q9GZR1	SENP6	Sentrin-specific protease 6
475	Q9BQF6	SENP7	Sentrin-specific protease 7
476	Q96LD8	SENP8	Sentrin-specific protease 8
477	Q12884	SEPR	Surface-expressed protease
478	P08185	SERPINA6	Corticosteroid-binding globulin
479	P05121	SERPINE1	Plasminogen activator inhibitor 1
480	P04278	SHBG	Sex hormone-binding globulin
481	Q9HAT2	SIAE	Sialate O-acetylesterase
482	Q99720	SIGMAR1	Sigma non-opioid intracellular receptor 1
483	Q96EB6	SIRT1	NAD-dependent protein deacetylase sirtuin-1
484	P19634	SL9A1	Sodium/hydrogen exchanger 1
485	Q86YT5	SLC13A5	Solute carrier family 13 member 5
486	P53985	SLC16A1	Solute carrier family 16 member 1
487	Q9NR83	SLC2A4	Solute carrier family 2 member 4
488	Q92911	SLC5A5	Solute carrier family 5 member 5
489	P23975	SLC6A2	Solute carrier family 6 member 2
490	Q01959	SLC6A3	Solute carrier family 6 member 3
491	P03973	SLPI	Secretory leukocyte protease inhibitor
492	Q15796	SMAD2	SMAD family member 2
493	P84022	SMAD3	SMAD family member 3
494	Q16637	SMN2	Survival motor neuron protein
495	P37840	SNCA	Alpha-synuclein
496	P31213	SRD5A2	3-oxo-5-alpha-steroid 4-dehydrogenase 2
497	Q9Y5Y6	ST14	Suppressor of tumorigenicity 14 protein
498	O75716	STK16	Serine/threonine-protein kinase 16
499	P43405	SYK	Spleen tyrosine kinase
500	P21452	TACR2	Tachykinin receptor 2
501	P24557	TBXAS1	Thromboxane-A synthase
502	Q9NUW8	TDP1	Tyrosyl-DNA phosphodiesterase 1
503	O14746	TERT	Telomerase reverse transcriptase
504	P10828	THRB	Thyroid hormone receptor beta
505	Q15399	TLR1	Toll-like receptor 1
506	Q9NR96	TLR9	Toll-like receptor 9
507	O60235	TMPRSS11D	Transmembrane protease serine 11D
508	P01375	TNF	Tumor necrosis factor
509	O14763	TNFRSF10B	Tumor necrosis factor receptor superfamily member 10B
510	O95271	TNKS	Poly [ADP-ribose] polymerase tankyrase-1
511	Q9H2K2	TNKS2	Poly [ADP-ribose] polymerase tankyrase-2
512	P63316	TNNC1	Troponin C, slow skeletal and cardiac muscles
513	P19429	TNNI3	Cardiac troponin I
514	P45379	TNNT2	Cardiac muscle troponin T
515	P11387	TOP1	DNA topoisomerase 1
516	P11388	TOP2A	DNA topoisomerase 2-alpha
517	O15350	TP73	Tumor protein p73
518	P51580	TPMT	Thiopurine S-methyltransferase
519	P02788	TRFL	Lactotransferrin
520	O75762	TRPA1	Transient receptor potential cation channel subfamily A member 1
521	P07996	TSP1	Thrombospondin-1
522	P02766	TTR	Transthyretin
523	Q9H4B7	TUBB1	Tubulin beta-1 chain
524	P04818	TYMS	Thymidylate synthase
525	P14679	TYR	Tyrosinase
526	P54578	UBP14	Ubiquitin carboxyl-terminal hydrolase 14
527	O94966	UBP19	Ubiquitin carboxyl-terminal hydrolase 19
528	P40818	UBP8	Ubiquitin carboxyl-terminal hydrolase 8
529	P19320	VCAM1	Vascular cell adhesion protein 1
530	P11473	VDR	Vitamin D3 receptor
531	Q86Y07	VRK2	Vaccinia-related kinase 2
532	P02774	VTDB	Vitamin D-binding protein
533	P04275	VWF	von Willebrand factor
534	Q14191	WRN	Werner syndrome ATP-dependent helicase
535	P47989	XDH	Xanthine dehydrogenase/oxidase
536	Q9NQW7	XPP1	Xaa-Pro aminopeptidase 1
537	P25311	ZA2G	Zinc-alpha-2-glycoprotein
538	Q9Y2L8	ZKSC5	Zinc finger protein with KRAB and SCAN domains 5

## Sheet: Schedule 4
NO.	Gene symbol	Description
1	ABCB1	ATP Binding Cassette Subfamily B Member 1
2	ABCC1	ATP Binding Cassette Subfamily C Member 1
3	ABCG2	ATP Binding Cassette Subfamily G Member 2 (Junior Blood Group)
4	ACE	Angiotensin I Converting Enzyme
5	ACTC1	Actin Alpha Cardiac Muscle 1
6	ADA	Adenosine Deaminase
7	ADAM12	ADAM Metallopeptidase Domain 12
8	ADAM17	ADAM Metallopeptidase Domain 17
9	ADAM33	ADAM Metallopeptidase Domain 33
10	ADAMTS9-AS2	ADAMTS9 Antisense RNA 2
11	ADCYAP1R1	ADCYAP Receptor Type I
12	ADK	Adenosine Kinase
13	ADPRH	ADP-Ribosylarginine Hydrolase
14	ADRB2	Adrenoceptor Beta 2
15	AFAP1-AS1	AFAP1 Antisense RNA 1
16	AGAP2-AS1	AGAP2 Antisense RNA 1
17	AHR	Aryl Hydrocarbon Receptor
18	AHSG	Alpha 2-HS Glycoprotein
19	AICDA	Activation Induced Cytidine Deaminase
20	AK2	Adenylate Kinase 2
21	AKR1B10	Aldo-keto reductase family 1 member B10
22	AKT2	AKT Serine/Threonine Kinase 2
23	ALB	Albumin
24	ALK	ALK Receptor Tyrosine Kinase
25	ALOX15	Arachidonate 15-Lipoxygenase
26	ALOX5	Arachidonate 5-Lipoxygenase
27	ANPEP	Alanyl Aminopeptidase, Membrane
28	ANXA2	Annexin A2
29	ANXA5	Annexin A5
30	AP2A2	Adaptor Related Protein Complex 2 Subunit Alpha 2
31	APAF1	Apoptotic Peptidase Activating Factor 1
32	APEX1	Apurinic/Apyrimidinic Endodeoxyribonuclease 1
33	APOE	Apolipoprotein E
34	APP	Amyloid Beta Precursor Protein
35	APTX	Aprataxin
36	AQP5	Aquaporin 5
37	AREG	Amphiregulin
38	ARMC4	Armadillo Repeat Containing 4
39	ARSH	Arylsulfatase Family Member H
40	ASAP1-IT1	ASAP1 Intronic Transcript 1
41	ASCL1	Achaete-Scute Family BHLH Transcription Factor 1
42	ATF2	Activating Transcription Factor 2
43	ATF6	Activating Transcription Factor 6
44	ATM	ATM Serine/Threonine Kinase
45	ATP12A	ATPase H+/K+ Transporting Non-Gastric Alpha2 Subunit
46	ATP4A	ATPase H+/K+ Transporting Subunit Alpha
47	ATR	ATR Serine/Threonine Kinase
48	AVP	Arginine Vasopressin
49	AXL	AXL Receptor Tyrosine Kinase
50	BAK1	BCL2 Antagonist/Killer 1
51	BANCR	BRAF-Activated Non-Protein Coding RNA
52	BAX	BCL2 Associated X, Apoptosis Regulator
53	BCAR4	Breast Cancer Anti-Estrogen Resistance 4
54	BCL11B	BAF Chromatin Remodeling Complex Subunit BCL11B
55	BCL2L1	BCL2 Like 1
56	BCL2L8	Bcl-2-like protein 8
57	BCYRN1	Brain Cytoplasmic RNA 1
58	BDNF	Brain Derived Neurotrophic Factor
59	BET1L	Bet1 Golgi Vesicular Membrane Trafficking Protein Like
60	BIRC2	Baculoviral IAP Repeat Containing 2
61	BIRC3	Baculoviral IAP Repeat Containing 3
62	BIRC5	Baculoviral IAP Repeat Containing 5
63	BIRC7	Baculoviral IAP Repeat Containing 7
64	BLACAT1	Bladder Cancer Associated Transcript 1
65	BLK	BLK Proto-Oncogene, Src Family Tyrosine Kinase
66	BLNK	B Cell Linker
67	BMP2	Bone Morphogenetic Protein 2
68	BMP6	Bone Morphogenetic Protein 6
69	BPIFA1	BPI Fold Containing Family A Member 1
70	BRAF	B-Raf Proto-Oncogene, Serine/Threonine Kinase
71	BRCA1	BRCA1 DNA Repair Associated
72	BRS3	Bombesin Receptor Subtype 3
73	BTK	Bruton Tyrosine Kinase
74	C14orf132	Chromosome 14 Open Reading Frame 132
75	C20orf85	Chromosome 20 Open Reading Frame 85
76	C21orf59-TCP10L	C21orf59-TCP10L Readthrough
77	C5AR1	Complement C5a Receptor 1
78	CA9	Carbonic Anhydrase 9
79	CACNA1C	Calcium Voltage-Gated Channel Subunit Alpha1 C
80	CACNA1G-AS1	CACNA1G Antisense RNA 1
81	CACNA2D1	Calcium Voltage-Gated Channel Auxiliary Subunit Alpha2delta 1
82	CACNB2	Calcium Voltage-Gated Channel Auxiliary Subunit Beta 2
83	CADM1	Cell Adhesion Molecule 1
84	CALCA	Calcitonin Related Polypeptide Alpha
85	CAMK2G	Calcium/Calmodulin Dependent Protein Kinase II Gamma
86	CARMIL2	Capping Protein Regulator And Myosin 1 Linker 2
87	CASC2	Cancer Susceptibility 2
88	CASC8	Cancer Susceptibility 8
89	CASC9	Cancer Susceptibility 9
90	CASP8	Caspase 8
91	CASP9	Caspase 9
92	CAT	Catalase
93	CAV1	Caveolin 1
94	CBX5	Chromobox 5
95	CCAT1	Colon Cancer Associated Transcript 1
96	CCAT2	Colon Cancer Associated Transcript 2
97	CCDC151	Coiled-Coil Domain Containing 151
98	CCDC65	Coiled-Coil Domain Containing 65
99	CCL11	C-C Motif Chemokine Ligand 11
100	CCL13	C-C Motif Chemokine Ligand 13
101	CCL17	C-C Motif Chemokine Ligand 17
102	CCL2	C-C Motif Chemokine Ligand 2
103	CCL22	C-C Motif Chemokine Ligand 22
104	CCL24	C-C Motif Chemokine Ligand 24
105	CCL26	C-C Motif Chemokine Ligand 26
106	CCL3	C-C Motif Chemokine Ligand 3
107	CCL4	C-C Motif Chemokine Ligand 4
108	CCL5	C-C Motif Chemokine Ligand 5
109	CCL7	C-C Motif Chemokine Ligand 7
110	CCN2	Cellular Communication Network Factor 2
111	CCNA2	Cyclin A2
112	CCNB1	Cyclin B1
113	CCND1	Cyclin D1
114	CCNE1	Cyclin E1
115	CCR3	C-C Motif Chemokine Receptor 3
116	CCR4	C-C Motif Chemokine Receptor 4
117	CCR5	C-C Motif Chemokine Receptor 5 (Gene/Pseudogene)
118	CCR6	C-C Motif Chemokine Receptor 6
119	CCR7	C-C Motif Chemokine Receptor 7
120	CCR8	C-C Motif Chemokine Receptor 8
121	CD14	CD14 Molecule
122	CD151	CD151 Molecule (Raph Blood Group)
123	CD163	CD163 Molecule
124	CD19	CD19 Molecule
125	CD1A	CD1a Molecule
126	CD1B	CD1b Molecule
127	CD1C	CD1c Molecule
128	CD1D	CD1d Molecule
129	CD1E	CD1e Molecule
130	CD27	CD27 Molecule
131	CD274	CD274 Molecule
132	CD28	CD28 Molecule
133	CD34	CD34 Molecule
134	CD36	CD36 Molecule
135	CD38	CD38 Molecule
136	CD3D	CD3d Molecule
137	CD3E	CD3e Molecule
138	CD3G	CD3g Molecule
139	CD40	CD40 Molecule
140	CD40LG	CD40 Ligand
141	CD44	CD44 Molecule (Indian Blood Group)
142	CD47	CD47 Molecule
143	CD69	CD69 Molecule
144	CD70	CD70 Molecule
145	CD79A	CD79a Molecule
146	CD79B	CD79b Molecule
147	CD81	CD81 Molecule
148	CD86	CD86 Molecule
149	CDCA7L	Cell Division Cycle Associated 7 Like
150	CDH1	Cadherin 1
151	CDH13	Cadherin 13
152	CDH2	Cadherin 2
153	CDK1	Cyclin Dependent Kinase 1
154	CDK2	Cyclin Dependent Kinase 2
155	CDK4	Cyclin Dependent Kinase 4
156	CDK6	Cyclin Dependent Kinase 6
157	CDKN1A	Cyclin Dependent Kinase Inhibitor 1A
158	CDKN1B	Cyclin Dependent Kinase Inhibitor 1B
159	CDKN2A	Cyclin Dependent Kinase Inhibitor 2A
160	CDKN2B	Cyclin Dependent Kinase Inhibitor 2B
161	CDKN2B-AS1	CDKN2B Antisense RNA 1
162	CEACAM5	Carcinoembryonic Antigen Related Cell Adhesion Molecule 5
163	CEBPB	CCAAT Enhancer Binding Protein Beta
164	CEL	Carboxyl Ester Lipase
165	CELA3B	Chymotrypsin Like Elastase 3B
166	CFAP221	Cilia And Flagella Associated Protein 221
167	CFAP298	Cilia And Flagella Associated Protein 298
168	CFLAR	CASP8 and FADD-like apoptosis regulator
169	CFTR	Cystic Fibrosis Transmembrane Conductance Regulator
170	CFTR-AS1	CFTR Antisense RNA 1
171	CHAT	Choline O-Acetyltransferase
172	CHEK1	Checkpoint Kinase 1
173	CHEK2	Checkpoint Kinase 2
174	CHGA	Chromogranin A
175	CHID1	Chitinase Domain Containing 1
176	CHKB	Choline Kinase Beta
177	CHRM3	Cholinergic Receptor Muscarinic 3
178	CHRNA3	Cholinergic Receptor Nicotinic Alpha 3 Subunit
179	CHRNA5	Cholinergic Receptor Nicotinic Alpha 5 Subunit
180	CHRNA7	Cholinergic Receptor Nicotinic Alpha 7 Subunit
181	CIITA	Class II Major Histocompatibility Complex Transactivator
182	CIRBP	Cold Inducible RNA Binding Protein
183	CLCA1	Chloride Channel Accessory 1
184	CNR1	Cannabinoid Receptor 1
185	COL18A1	Collagen Type XVIII Alpha 1 Chain
186	COL20A1	Collagen Type XX Alpha 1 Chain
187	COL2A1	Collagen Type II Alpha 1 Chain
188	COL4A3	Collagen Type IV Alpha 3 Chain
189	COPD	Pulmonary Disease, Chronic Obstructive, Severe Early-Onset
190	CORO1A	Coronin 1A
191	COTL1	Coactosin Like F-Actin Binding Protein 1
192	CP	Ceruloplasmin
193	CPS1-IT1	CPS1 Intronic Transcript 1
194	CR1	Complement C3b/C4b Receptor 1 (Knops Blood Group)
195	CR2	Complement C3d Receptor 2
196	CRACR2B	Calcium Release Activated Channel Regulator 2B
197	CRAT	Carnitine O-Acetyltransferase
198	CREB1	CAMP Responsive Element Binding Protein 1
199	CRP	C-Reactive Protein
200	CSF1	Colony Stimulating Factor 1
201	CSF2	Colony Stimulating Factor 2
202	CSF3	Colony Stimulating Factor 3
203	CSMD1	CUB And Sushi Multiple Domains 1
204	CSN1S1	Casein Alpha S1
205	CT83	Cancer/Testis Antigen 83
206	CTAG1B	Cancer/Testis Antigen 1B
207	CTLA4	Cytotoxic T-Lymphocyte Associated Protein 4
208	CTNNB1	Catenin Beta 1
209	CTNND1	Catenin Delta 1
210	CTSB	Cathepsin B
211	CTSG	Cathepsin G
212	CXCL1	C-X-C Motif Chemokine Ligand 1
213	CXCL10	C-X-C Motif Chemokine Ligand 10
214	CXCL11	C-X-C Motif Chemokine Ligand 11
215	CXCL12	C-X-C Motif Chemokine Ligand 12
216	CXCL8	C-X-C Motif Chemokine Ligand 8
217	CXCL9	C-X-C Motif Chemokine Ligand 9
218	CXCR1	C-X-C Motif Chemokine Receptor 1
219	CXCR2	C-X-C Motif Chemokine Receptor 2
220	CXCR3	C-X-C Motif Chemokine Receptor 3
221	CXCR4	C-X-C Motif Chemokine Receptor 4
222	CXorf65	Chromosome X Open Reading Frame 65
223	CYBB	Cytochrome b558 subunit beta
224	CYCS	Cytochrome C, Somatic
225	CYP1A1	Cytochrome P450 Family 1 Subfamily A Member 1
226	CYP1B1	Cytochrome P450 Family 1 Subfamily B Member 1
227	CYP2A6	Cytochrome P450 Family 2 Subfamily A Member 6
228	CYP2B6	Cytochrome P450 family 2 subfamily B member 6
229	CYP2C19	Cytochrome P450 Family 2 Subfamily C Member 19
230	CYP2D6	Cytochrome P450 Family 2 Subfamily D Member 6
231	CYP2E1	Cytochrome P450 Family 2 Subfamily E Member 1
232	CYP2F1	Cytochrome P450 Family 2 Subfamily F Member 1
233	CYP2J2	Cytochrome P450 Family 2 Subfamily J Member 2
234	CYP2S1	Cytochrome P450 Family 2 Subfamily S Member 1
235	CYP3A4	Cytochrome P450 Family 3 Subfamily A Member 4
236	CYS1	Cystin 1
237	CYSLTR1	Cysteinyl Leukotriene Receptor 1
238	DANCR	Differentiation Antagonizing Non-Protein Coding RNA
239	DAPK1	Death Associated Protein Kinase 1
240	DCK	Deoxycytidine Kinase
241	DCLRE1C	DNA Cross-Link Repair 1C
242	DDIT4	DNA Damage Inducible Transcript 4
243	DDR2	Discoidin Domain Receptor Tyrosine Kinase 2
244	DDX1	DEAD-Box Helicase 1
245	DEFB1	Defensin Beta 1
246	DGCR5	DiGeorge Syndrome Critical Region Gene 5
247	DHDH	Dihydrodiol Dehydrogenase
248	DHFR	Dihydrofolate Reductase
249	DHPS	Deoxyhypusine Synthase
250	DIABLO	Diablo IAP-Binding Mitochondrial Protein
251	DLEC1	DLEC1 Cilia And Flagella Associated Protein
252	DLGAP2	DLG Associated Protein 2
253	DNAAF1	Dynein Axonemal Assembly Factor 1
254	DNAAF5	Dynein Axonemal Assembly Factor 5
255	DNAH11	Dynein Axonemal Heavy Chain 11
256	DNASE1	Deoxyribonuclease 1
257	DNMT1	DNA Methyltransferase 1
258	DPP4	Dipeptidyl Peptidase 4
259	DUSP1	Dual Specificity Phosphatase 1
260	E2F1	E2F Transcription Factor 1
261	EDN1	Endothelin 1
262	EFS	Embryonal Fyn-Associated Substrate
263	EGF	Epidermal Growth Factor
264	EIF2AK2	Eukaryotic Translation Initiation Factor 2 Alpha Kinase 2
265	EIF2S1	Eukaryotic Translation Initiation Factor 2 Subunit Alpha
266	ELANE	Elastase, Neutrophil Expressed
267	ELAVL4	ELAV Like RNA Binding Protein 4
268	ELN	Elastin
269	EML4	EMAP Like 4
270	ENO1	Enolase 1
271	ENO2	Enolase 2
272	EOS	Eosinophilia, Familial
273	EPB41L3	Erythrocyte Membrane Protein Band 4.1 Like 3
274	EPB41L4A-DT	EPB41L4A Divergent Transcript
275	EPCAM	Epithelial Cell Adhesion Molecule
276	EPHX1	Epoxide Hydrolase 1
277	EPX	Eosinophil Peroxidase
278	ERBB2	Erb-B2 Receptor Tyrosine Kinase 2
279	ERBB3	Erb-B2 Receptor Tyrosine Kinase 3
280	ERBB4	Erb-B2 Receptor Tyrosine Kinase 4
281	ERCC1	ERCC Excision Repair 1, Endonuclease Non-Catalytic Subunit
282	ERCC2	ERCC Excision Repair 2, TFIIH Core Complex Helicase Subunit
283	ERCC5	ERCC Excision Repair 5, Endonuclease
284	ERCC6	ERCC Excision Repair 6, Chromatin Remodeling Factor
285	ERN1	Endoplasmic Reticulum To Nucleus Signaling 1
286	ESR2	Estrogen Receptor 2
287	F13B	Coagulation Factor XIII B Chain
288	F2	Coagulation Factor II, Thrombin
289	F2R	Coagulation Factor II Thrombin Receptor
290	F2RL1	F2R Like Trypsin Receptor 1
291	FAM13A	Family With Sequence Similarity 13 Member A
292	FAM83H-AS1	FAM83H Antisense RNA 1 (Head To Head)
293	FAS	Fas Cell Surface Death Receptor
294	FAS-AS1	FAS Antisense RNA 1
295	FASLG	Fas Ligand
296	FCER2	Fc Fragment Of IgE Receptor II
297	FCGR2B	Fc Fragment Of IgG Receptor IIb
298	FCGR2C	Fc Fragment Of IgG Receptor IIc (Gene/Pseudogene)
299	FCGR3B	Fc Fragment Of IgG Receptor IIIb
300	FCGRT	Fc Fragment Of IgG Receptor And Transporter
301	FCRL6	Fc Receptor Like 6
302	FCRLB	Fc Receptor Like B
303	FENDRR	FOXF1 Adjacent Non-Coding Developmental Regulatory RNA
304	FEV	FEV, ETS transcription factor
305	FEZF1-AS1	FEZF1 Antisense RNA 1
306	FGF2	Fibroblast Growth Factor 2
307	FGFR1	Fibroblast Growth Factor Receptor 1
308	FGFR2	Fibroblast Growth Factor Receptor 2
309	FHIT	Fragile Histidine Triad Diadenosine Triphosphatase
310	FLNA	filamin A
311	FLT1	Fms Related Tyrosine Kinase 1
312	FLT3	Fms Related Tyrosine Kinase 3
313	FLT4	Fms Related Tyrosine Kinase 4
314	FN1	Fibronectin 1
315	FOXD2-AS1	FOXD2 Adjacent Opposite Strand RNA 1
316	FOXO3	Forkhead Box O3
317	FOXP3	Forkhead Box P3
318	FPR1	Formyl Peptide Receptor 1
319	FUCA1	Alpha-L-Fucosidase 1
320	FURIN	Furin, Paired Basic Amino Acid Cleaving Enzyme
321	FUT3	Fucosyltransferase 3 (Lewis Blood Group)
322	FUT4	Fucosyltransferase 4
323	FZD8	Frizzled Class Receptor 8
324	G6PD	Glucose-6-Phosphate Dehydrogenase
325	GABPA	GA Binding Protein Transcription Factor Subunit Alpha
326	GABRA2	Gamma-Aminobutyric Acid Type A Receptor Alpha2 Subunit
327	GACAT2	Gastric Cancer Associated Transcript 2
328	GADD45A	Growth Arrest And DNA Damage Inducible Alpha
329	GALE	UDP-Galactose-4-Epimerase
330	GALNS	Galactosamine (N-Acetyl)-6-Sulfatase
331	GAS5	Growth Arrest Specific 5
332	GAS5-AS1	GAS5 Antisense RNA 1
333	GAS6-AS1	GAS6 Antisense RNA 1
334	GAS8	Growth Arrest Specific 8
335	GAS8-AS1	GAS8 Antisense RNA 1
336	GATA3	GATA Binding Protein 3
337	GATA4	GATA Binding Protein 4
338	GC	GC Vitamin D Binding Protein
339	GGPS1	Geranylgeranyl Diphosphate Synthase 1
340	GGT1	Gamma-Glutamyltransferase 1
341	GHET1	Gastric Carcinoma Proliferation Enhancing Transcript 1
342	GK	Glycerol Kinase
343	GLA	Galactosidase Alpha
344	GM2A	GM2 Ganglioside Activator
345	GMPS	Guanine Monophosphate Synthase
346	GNAS-AS1	GNAS Antisense RNA 1
347	GNPTAB	N-Acetylglucosamine-1-Phosphate Transferase Subunits Alpha And Beta
348	GNPTG	N-Acetylglucosamine-1-Phosphate Transferase Subunit Gamma
349	GP5	Glycoprotein V Platelet
350	GPSM2	G Protein Signaling Modulator 2
351	GRP	Gastrin Releasing Peptide
352	GRPR	Gastrin Releasing Peptide Receptor
353	GSN	Gelsolin
354	GSR	Glutathione-Disulfide Reductase
355	GSTM1	Glutathione S-Transferase Mu 1
356	GSTM2	Glutathione S-Transferase Mu 2
357	GSTP1	Glutathione S-Transferase Pi 1
358	GSTT1	Glutathione S-Transferase Theta 1
359	GUCY1B2	Guanylate Cyclase 1 Soluble Subunit Beta 2 (Pseudogene)
360	GUSB	Glucuronidase Beta
361	GZMA	Granzyme A
362	GZMK	Granzyme K
363	H19	H19 Imprinted Maternally Expressed Transcript
364	H2AFX	H2A Histone Family Member X
365	HAGLR	HOXD Antisense Growth-Associated Long Non-Coding RNA
366	HBEGF	Heparin Binding EGF Like Growth Factor
367	HDAC2	Histone Deacetylase 2
368	HDGF	Heparin Binding Growth Factor
369	HGF	Hepatocyte Growth Factor
370	HHIP	Hedgehog Interacting Protein
371	HHIP-AS1	HHIP Antisense RNA 1
372	HIF1A	Hypoxia Inducible Factor 1 Subunit Alpha
373	HIF1A-AS1	HIF1A Antisense RNA 1
374	HIST2H2AA3	Histone Cluster 2 H2A Family Member A3
375	HLA-A	Major histocompatibility complex, class I, A
376	HMOX1	Heme Oxygenase 1
377	HNF1A-AS1	HNF1A Antisense RNA 1
378	HNMT	Histamine N-Methyltransferase
379	HNRNPA2B1	Heterogeneous Nuclear Ribonucleoprotein A2/B1
380	HOTAIR	HOX Transcript Antisense RNA
381	HOTTIP	HOXA Distal Transcript Antisense RNA
382	HOXA11-AS	HOXA11 Antisense RNA
383	HP	Haptoglobin
384	HPGDS	Hematopoietic Prostaglandin D Synthase
385	HRAS	HRas Proto-Oncogene, GTPase
386	HRH1	Histamine Receptor H1
387	HRH2	Histamine Receptor H2
388	HSP90AA1	Heat Shock Protein 90 Alpha Family Class A Member 1
389	HSP90AB1	Heat Shock Protein 90 Alpha Family Class B Member 1
390	HSPA4	Heat Shock Protein Family A (Hsp70) Member 4
391	HSPA9	Heat Shock Protein Family A (Hsp70) Member 9
392	HSPB1	Heat Shock Protein Family B (Small) Member 1
393	HSPG2	Heparan Sulfate Proteoglycan 2
394	HYDIN	HYDIN Axonemal Central Pair Apparatus Protein
395	HYKK	Hydroxylysine Kinase
396	HYOU1	Hypoxia Up-Regulated 1
397	ICAM1	Intercellular Adhesion Molecule 1
398	ICAM2	Intercellular Adhesion Molecule 2
399	ICAM3	Intercellular Adhesion Molecule 3
400	ICOS	Inducible T Cell Costimulator
401	ICOSLG	Inducible T Cell Costimulator Ligand
402	IDS	Iduronate 2-Sulfatase
403	IFNA1	Interferon Alpha 1
404	IFNA2	Interferon Alpha 2
405	IFNB1	Interferon Beta 1
406	IFNG	Interferon Gamma
407	IFNGR1	Interferon Gamma Receptor 1
408	IGES	Immunoglobulin E Concentration, Serum
409	IGF1R	Insulin Like Growth Factor 1 Receptor
410	IGF2-AS	IGF2 Antisense RNA
411	IGF2R	Insulin Like Growth Factor 2 Receptor
412	IGFBP3	Insulin Like Growth Factor Binding Protein 3
413	IGHE	Immunoglobulin Heavy Constant Epsilon
414	IGHM	Immunoglobulin Heavy Constant Mu
415	IGLL1	Immunoglobulin Lambda Like Polypeptide 1
416	IKBKB	Inhibitor Of Nuclear Factor Kappa B Kinase Subunit Beta
417	IL10	Interleukin 10
418	IL12A	Interleukin 12A
419	IL12B	Interleukin 12B
420	IL13	Interleukin 13
421	IL15	Interleukin 15
422	IL16	Interleukin 16
423	IL17A	Interleukin 17A
424	IL17RA	Interleukin 17 Receptor A
425	IL18	Interleukin 18
426	IL18R1	Interleukin 18 Receptor 1
427	IL1A	Interleukin 1 Alpha
428	IL1B	Interleukin 1 Beta
429	IL1RN	Interleukin 1 Receptor Antagonist
430	IL2	Interleukin 2
431	IL21	Interleukin 21
432	IL21R	Interleukin 21 Receptor
433	IL24	Interleukin 24
434	IL2RA	Interleukin 2 Receptor Subunit Alpha
435	IL2RB	Interleukin 2 Receptor Subunit Beta
436	IL2RG	Interleukin 2 Receptor Subunit Gamma
437	IL3	Interleukin 3
438	IL33	Interleukin 33
439	IL4	Interleukin 4
440	IL5	Interleukin 5
441	IL6	Interleukin 6
442	IL7	Interleukin 7
443	IL7R	Interleukin 7 Receptor
444	IL9	Interleukin 9
445	IL9R	Interleukin 9 receptor
446	ILK	Integrin Linked Kinase
447	INS	Insulin
448	IRAIN	IGF1R Antisense Imprinted Non-Protein Coding RNA
449	IREB2	Iron Responsive Element Binding Protein 2
450	IRF1	Interferon Regulatory Factor 1
451	IRF2BP2	Interferon Regulatory Factor 2 Binding Protein 2
452	IRF4	Interferon Regulatory Factor 4
453	ITGA4	Integrin Subunit Alpha 4
454	ITGAL	Integrin Subunit Alpha L
455	ITGAV	Integrin Subunit Alpha V
456	ITGB1	Integrin Subunit Beta 1
457	ITGB2	Integrin Subunit Beta 2
458	ITK	IL2 Inducible T Cell Kinase
459	JAK3	Janus Kinase 3
460	JMJD6	Jumonji Domain Containing 6, Arginine Demethylase And Lysine Hydroxylase
461	JUN	Jun Proto-Oncogene, AP-1 Transcription Factor Subunit
462	KAT2A	Lysine Acetyltransferase 2A
463	KAT2B	Lysine Acetyltransferase 2B
464	KCNE1	Potassium Voltage-Gated Channel Subfamily E Regulatory Subunit 1
465	KCNH2	Potassium Voltage-Gated Channel Subfamily H Member 2
466	KCNMB2-AS1	KCNMB2 Antisense RNA 1
467	KCNQ1	Potassium Voltage-Gated Channel Subfamily Q Member 1
468	KCNQ1OT1	KCNQ1 Opposite Strand/Antisense Transcript 1
469	KDELR1	KDEL Endoplasmic Reticulum Protein Retention Receptor 1
470	KDR	Kinase Insert Domain Receptor
471	KIT	KIT Proto-Oncogene, Receptor Tyrosine Kinase
472	KITLG	KIT Ligand
473	KLF6	Kruppel Like Factor 6
474	KLK1	Kallikrein 1
475	KLRC1	Killer Cell Lectin Like Receptor C1
476	KNG1	Kininogen 1
477	KRAS	KRAS Proto-Oncogene, GTPase
478	KRT18	Keratin 18
479	KRT18P51	Keratin 18 Pseudogene 51
480	KRT19	Keratin 19
481	KRT7	Keratin 7
482	LACTB	Lactamase Beta
483	LALBA	Lactalbumin Alpha
484	LAT	Linker For Activation Of T Cells
485	LBP	Lipopolysaccharide Binding Protein
486	LCAL1	Lung Cancer Associated LncRNA 1
487	LCK	LCK Proto-Oncogene, Src Family Tyrosine Kinase
488	LCN1	Lipocalin 1
489	LCN2	Lipocalin 2
490	LEP	Leptin
491	LEPQTL1	Leptin, Serum Levels Of
492	LEPR	Leptin Receptor
493	LIF	LIF Interleukin 6 Family Cytokine
494	LIG4	DNA Ligase 4
495	LIMK1	LIM Domain Kinase 1
496	LMO2	LIM Domain Only 2
497	LRBA	LPS Responsive Beige-Like Anchor Protein
498	LRP1B	LDL Receptor Related Protein 1B
499	LRRC6	Leucine Rich Repeat Containing 6
500	LRRC8A	Leucine Rich Repeat Containing 8 VRAC Subunit A
501	LTA	Lymphotoxin Alpha
502	LTA4H	Leukotriene A4 Hydrolase
503	LTB	lymphotoxin beta
504	LTBR	Lymphotoxin Beta Receptor
505	LTF	Lactotransferrin
506	LUCAT1	Lung Cancer Associated Transcript 1
507	LVRN	Laeverin
508	M6PR	Mannose-6-Phosphate Receptor, Cation Dependent
509	MAFA-AS1	MAFA Antisense RNA 1
510	MAGEA1	MAGE Family Member A1
511	MAGEA3	MAGE Family Member A3
512	MAGEA4	MAGE Family Member A4
513	MALAT1	Metastasis Associated Lung Adenocarcinoma Transcript 1
514	MALINC1	Mitosis Associated Long Intergenic Non-Coding RNA 1
515	MAOA	Monoamine Oxidase A
516	MAOB	Monoamine Oxidase B
517	MAP2K1	Mitogen-Activated Protein Kinase Kinase 1
518	MAP3K8	Mitogen-Activated Protein Kinase Kinase Kinase 8
519	MAPK1	Mitogen-Activated Protein Kinase 1
520	MAPK14	Mitogen-Activated Protein Kinase 14
521	MAPK3	Mitogen-Activated Protein Kinase 3
522	MAPK8	Mitogen-Activated Protein Kinase 8
523	MARCKS	Myristoylated Alanine Rich Protein Kinase C Substrate
524	MARCO	Macrophage Receptor With Collagenous Structure
525	MAT2A	Methionine Adenosyltransferase 2A
526	MBL2	Mannose Binding Lectin 2
527	MCL1	MCL1 Apoptosis Regulator, BCL2 Family Member
528	MCTP2	Multiple C2 And Transmembrane Domain Containing 2
529	MDC1	Mediator Of DNA Damage Checkpoint 1
530	MDM2	MDM2 Proto-Oncogene
531	MECP2	Methyl-CpG Binding Protein 2
532	MEG3	Maternally Expressed 3
533	MET	MET Proto-Oncogene, Receptor Tyrosine Kinase
534	MGMT	O-6-Methylguanine-DNA Methyltransferase
535	MGP	Matrix Gla Protein
536	MIAT	Myocardial Infarction Associated Transcript
537	MICAL1	Microtubule Associated Monooxygenase, Calponin And LIM Domain Containing 1
538	MKI67	Marker Of Proliferation Ki-67
539	MLH1	MutL Homolog 1
540	MME	Membrane Metalloendopeptidase
541	MMP1	Matrix Metallopeptidase 1
542	MMP12	Matrix Metallopeptidase 12
543	MMP13	Matrix Metallopeptidase 13
544	MMP2	Matrix Metallopeptidase 2
545	MMP3	Matrix Metallopeptidase 3
546	MMP7	Matrix Metallopeptidase 7
547	MMP8	Matrix Metallopeptidase 8
548	MMP9	Matrix Metallopeptidase 9
549	MPO	Myeloperoxidase
550	MRE11	MRE11 Homolog, Double Strand Break Repair Nuclease
551	MRPL28	Mitochondrial Ribosomal Protein L28
552	MS4A1	Membrane Spanning 4-Domains A1
553	MS4A2	Membrane Spanning 4-Domains A2
554	MSH5	MutS Homolog 5
555	MSMB	Microseminoprotein Beta
556	MTOR	Mechanistic Target Of Rapamycin Kinase
557	MUC1	Mucin 1, Cell Surface Associated
558	MUC2	Mucin 2, Oligomeric Mucus/Gel-Forming
559	MUC20-OT1	MUC20 Overlapping Transcript
560	MUC3A	Mucin 3A, Cell Surface Associated
561	MUC4	Mucin 4, Cell Surface Associated
562	MUC5AC	Mucin 5AC, Oligomeric Mucus/Gel-Forming
563	MUC5B	Mucin 5B, Oligomeric Mucus/Gel-Forming
564	MUC7	Mucin 7, Secreted
565	MVP	Major Vault Protein
566	MXRA5	Matrix Remodeling Associated 5
567	MYC	MYC Proto-Oncogene, BHLH Transcription Factor
568	MYCL	MYCL Proto-Oncogene, BHLH Transcription Factor
569	MYCN	MYCN Proto-Oncogene, BHLH Transcription Factor
570	MYEF2	Myelin Expression Factor 2
571	MYH7	Myosin Heavy Chain 7
572	MYO18B	Myosin XVIIIB
573	NAGLU	N-Acetyl-Alpha-Glucosaminidase
574	NAPSA	Napsin A Aspartic Peptidase
575	NBN	Nibrin
576	NCAM1	Neural Cell Adhesion Molecule 1
577	NDRG1	N-Myc Downstream Regulated 1
578	NEAT1	Nuclear Paraspeckle Assembly Transcript 1
579	NEU1	Neuraminidase 1
580	NEXN-AS1	NEXN Antisense RNA 1
581	NFKB1	Nuclear Factor Kappa B Subunit 1
582	NFKB2	Nuclear Factor Kappa B Subunit 2
583	NFKBIA	NFKB Inhibitor Alpha
584	NHEJ1	Non-Homologous End Joining Factor 1
585	NKILA	NF-KappaB Interacting LncRNA
586	NKX2-1	NK2 Homeobox 1
587	NLRP12	NLR Family Pyrin Domain Containing 12
588	NMB	Neuromedin B
589	NMBR	Neuromedin B Receptor
590	NME1	NME/NM23 Nucleoside Diphosphate Kinase 1
591	NME4	NME/NM23 Nucleoside Diphosphate Kinase 4
592	NOP56	NOP56 Ribonucleoprotein
593	NOS2	Nitric Oxide Synthase 2
594	NOS3	Nitric Oxide Synthase 3
595	NOTCH1	Notch Receptor 1
596	NPAT	Nuclear Protein, Coactivator Of Histone Transcription
597	NPM1	Nucleophosmin 1
598	NPPB	Natriuretic Peptide B
599	NPSR1	Neuropeptide S Receptor 1
600	NPTX1	Neuronal Pentraxin 1
601	NPY	Neuropeptide Y
602	NQO1	NAD(P)H Quinone Dehydrogenase 1
603	NR3C1	Nuclear Receptor Subfamily 3 Group C Member 1
604	NRAS	NRAS Proto-Oncogene, GTPase
605	NRG1	Neuregulin 1
606	ODC1	Ornithine Decarboxylase 1
607	OGG1	8-Oxoguanine DNA Glycosylase
608	OMP	Olfactory Marker Protein
609	OPRK1	Opioid Receptor Kappa 1
610	OPRM1	Opioid Receptor Mu 1
611	ORAI1	ORAI Calcium Release-Activated Calcium Modulator 1
612	ORMDL3	ORMDL Sphingolipid Biosynthesis Regulator 3
613	P2RX7	Purinergic Receptor P2X 7
614	PANDAR	Promoter Of CDKN1A Antisense DNA Damage Activated RNA
615	PARP1	Poly(ADP-Ribose) Polymerase 1
616	PCAT1	Prostate Cancer Associated Transcript 1
617	PCAT6	Prostate Cancer Associated Transcript 6
618	PCAT7	Prostate Cancer Associated Transcript 7
619	PCBP2-OT1	PCBP2 Overlapping Transcript 1
620	PCNA	Proliferating Cell Nuclear Antigen
621	PDCD1	Programmed Cell Death 1
622	PDE4A	Phosphodiesterase 4A
623	PDE4D	Phosphodiesterase 4D
624	PDGFRB	Platelet Derived Growth Factor Receptor Beta
625	PDPK1	3-Phosphoinositide Dependent Protein Kinase 1
626	PGF	Placental Growth Factor
627	PHKA2	Phosphorylase Kinase Regulatory Subunit Alpha 2
628	PHRF1	PHD And Ring Finger Domains 1
629	PI3	Peptidase Inhibitor 3
630	PIDD1	P53-Induced Death Domain Protein 1
631	PIK3CA	Phosphatidylinositol-4,5-Bisphosphate 3-Kinase Catalytic Subunit Alpha
632	PIK3CG	Phosphatidylinositol-4,5-Bisphosphate 3-Kinase Catalytic Subunit Gamma
633	PIK3R1	Phosphoinositide-3-Kinase Regulatory Subunit 1
634	PITRM1	Pitrilysin Metallopeptidase 1
635	PLAGL2	PLAG1 Like Zinc Finger 2
636	PLAT	Plasminogen Activator, Tissue Type
637	PLAU	Plasminogen Activator, Urokinase
638	PLAUR	Plasminogen Activator, Urokinase Receptor
639	PLCG2	Phospholipase C Gamma 2
640	PLG	Plasminogen
641	PMCH	Pro-Melanin Concentrating Hormone
642	PNP	Purine Nucleoside Phosphorylase
643	POLD1	DNA Polymerase Delta 1, Catalytic Subunit
644	POSTN	Periostin
645	PPARG	Peroxisome Proliferator Activated Receptor Gamma
646	PPIA	Peptidylprolyl Isomerase A
647	PPIEL	Peptidylprolyl Isomerase E Like Pseudogene
648	PPP1R15A	Protein Phosphatase 1 Regulatory Subunit 15A
649	PPP1R15B	Protein Phosphatase 1 Regulatory Subunit 15B
650	PPP2R1B	Protein Phosphatase 2 Scaffold Subunit Abeta
651	PRAL	P53 Regulation Associated LncRNA
652	PRB4	Proline Rich Protein BstNI Subfamily 4
653	PRDM2	PR/SET Domain 2
654	PRG2	Proteoglycan 2, Pro Eosinophil Major Basic Protein
655	PRKCA	Protein Kinase C Alpha
656	PRKCD	Protein Kinase C Delta
657	PRKCI	Protein Kinase C Iota
658	PRKCSH	Protein Kinase C Substrate 80K-H
659	PRKDC	Protein Kinase, DNA-Activated, Catalytic Subunit
660	PRKN	Parkin RBR E3 Ubiquitin Protein Ligase
661	PRTN3	Proteinase 3
662	PSAP	Prosaposin
663	PSEN2	Presenilin 2
664	PTEN	Phosphatase And Tensin Homolog
665	PTGDR	Prostaglandin D2 Receptor
666	PTGDR2	Prostaglandin D2 Receptor 2
667	PTGDS	Prostaglandin D2 Synthase
668	PTGER1	Prostaglandin E Receptor 1
669	PTGS1	Prostaglandin-Endoperoxide Synthase 1
670	PTGS2	Prostaglandin-Endoperoxide Synthase 2
671	PTHLH	Parathyroid Hormone Like Hormone
672	PTK2	Protein Tyrosine Kinase 2
673	PTK2B	Protein Tyrosine Kinase 2 Beta
674	PTPRC	Protein Tyrosine Phosphatase Receptor Type C
675	PVT1	Pvt1 Oncogene
676	RAC2	Rac Family Small GTPase 2
677	RAD50	RAD50 Double Strand Break Repair Protein
678	RAF1	Raf-1 Proto-Oncogene, Serine/Threonine Kinase
679	RAG1	Recombination Activating 1
680	RAG2	Recombination Activating 2
681	RALBP1	RalA Binding Protein 1
682	RARB	Retinoic Acid Receptor Beta
683	RASSF1	Ras Association Domain Family Member 1
684	RB1	RB Transcriptional Corepressor 1
685	RBM38	RNA Binding Motif Protein 38
686	RBM5	RNA Binding Motif Protein 5
687	RCVRN	Recoverin
688	RELA	Transcription factor p65
689	REN	Renin
690	RFX5	Regulatory Factor X5
691	RFXANK	Regulatory Factor X Associated Ankyrin Containing Protein
692	RFXAP	Regulatory Factor X Associated Protein
693	RGL3	Ral Guanine Nucleotide Dissociation Stimulator Like 3
694	RGMB-AS1	RGMB Antisense RNA 1
695	RIOX2	Ribosomal Oxygenase 2
696	RLFP1	Rearranged L-myc Fusion Pseudogene 1
697	RMRP	RNA Component Of Mitochondrial RNA Processing Endoribonuclease
698	RNASE2	Ribonuclease A Family Member 2
699	RNASE3	Ribonuclease A Family Member 3
700	RNF168	Ring Finger Protein 168
701	RNF8	Ring Finger Protein 8
702	RNY1	RNA, Ro60-Associated Y1
703	RNY3	RNA, Ro60-Associated Y3
704	ROS1	ROS Proto-Oncogene 1, Receptor Tyrosine Kinase
705	RPA1	Replication Protein A1
706	RPA2	Replication Protein A2
707	RPGR	Retinitis Pigmentosa GTPase Regulator
708	RPL31P11	Ribosomal Protein L31 Pseudogene 11
709	RPLP2	Ribosomal Protein Lateral Stalk Subunit P2
710	RRM1	Ribonucleotide Reductase Catalytic Subunit M1
711	S100A12	S100 Calcium Binding Protein A12
712	S100A2	S100 Calcium Binding Protein A2
713	S100A8	S100 Calcium Binding Protein A8
714	S100A9	S100 Calcium Binding Protein A9
715	SAA4	Serum Amyloid A4, Constitutive
716	SAT1	Spermidine/Spermine N1-Acetyltransferase 1
717	SBF2-AS1	SBF2 Antisense RNA 1
718	SCGB1A1	Secretoglobin Family 1A Member 1
719	SCNN1A	Sodium Channel Epithelial 1 Alpha Subunit
720	SCNN1B	Sodium Channel Epithelial 1 Beta Subunit
721	SCNN1G	Sodium Channel Epithelial 1 Gamma Subunit
722	SCUBE3	Signal Peptide, CUB Domain And EGF Like Domain Containing 3
723	SELE	Selectin E
724	SELL	Selectin L
725	SEMA3B	Semaphorin 3B
726	SERPINA1	Serpin Family A Member 1
727	SERPINA3	Serpin Family A Member 3
728	SERPINA7	Serpin Family A Member 7
729	SERPINB1	Serpin Family B Member 1
730	SERPINB3	Serpin Family B Member 3
731	SERPINB4	Serpin Family B Member 4
732	SERPINE1	Serpin Family E Member 1
733	SFTPA1	Surfactant Protein A1
734	SFTPB	Surfactant Protein B
735	SFTPC	Surfactant Protein C
736	SFTPD	Surfactant Protein D
737	SGK1	Serum/Glucocorticoid Regulated Kinase 1
738	SGO1-AS1	SGO1 Antisense RNA 1
739	SH2D1A	SH2 Domain Containing 1A
740	SH3BP5	SH3 Domain Binding Protein 5
741	SKP2	S-Phase Kinase Associated Protein 2
742	SLC16A1-AS1	SLC16A1 Antisense RNA 1
743	SLC17A5	Solute Carrier Family 17 Member 5
744	SLC22A18	Solute Carrier Family 22 Member 18
745	SLC26A5	Solute Carrier Family 26 Member 5
746	SLC26A9	Solute Carrier Family 26 Member 9
747	SLC2A1	Solute Carrier Family 2 Member 1
748	SLC4A1	Solute Carrier Family 4 Member 1 (Diego Blood Group)
749	SLC5A1	Solute Carrier Family 5 Member 1
750	SLC9A3	Solute Carrier Family 9 Member A3
751	SLPI	Secretory Leukocyte Peptidase Inhibitor
752	SMPD1	Sphingomyelin Phosphodiesterase 1
753	SNHG1	Small Nucleolar RNA Host Gene 1
754	SNHG12	Small Nucleolar RNA Host Gene 12
755	SNHG15	Small Nucleolar RNA Host Gene 15
756	SNHG16	Small Nucleolar RNA Host Gene 16
757	SNHG20	Small Nucleolar RNA Host Gene 20
758	SNHG5	Small Nucleolar RNA Host Gene 5
759	SNHG7	Small Nucleolar RNA Host Gene 7
760	SNORA52	Small Nucleolar RNA, H/ACA Box 52
761	SOCS3	Suppressor Of Cytokine Signaling 3
762	SOD1	Superoxide Dismutase 1
763	SOD2	Superoxide Dismutase 2
764	SOD3	Superoxide Dismutase 3
765	SOX2-OT	SOX2 Overlapping Transcript
766	SPAAR	Small Regulatory Polypeptide Of Amino Acid Response
767	SPAG1	Sperm Associated Antigen 1
768	SPP1	Secreted Phosphoprotein 1
769	SPRY4-IT1	SPRY4 Intronic Transcript 1
770	SRC	SRC Proto-Oncogene, Non-Receptor Tyrosine Kinase
771	ST3GAL4	ST3 Beta-Galactoside Alpha-2,3-Sialyltransferase 4
772	ST3GAL6	ST3 Beta-Galactoside Alpha-2,3-Sialyltransferase 6
773	STAT1	Signal Transducer And Activator Of Transcription 1
774	STAT3	Signal Transducer And Activator Of Transcription 3
775	STAT5A	Signal Transducer And Activator Of Transcription 5A
776	STAT5B	Signal Transducer And Activator Of Transcription 5B
777	STAT6	Signal Transducer And Activator Of Transcription 6
778	STIM1	Stromal Interaction Molecule 1
779	STK11	Serine/Threonine Kinase 11
780	STK4	Serine/Threonine Kinase 4
781	SYP	Synaptophysin
782	TAC1	Tachykinin Precursor 1
783	TACR1	Tachykinin Receptor 1
784	TACR2	Tachykinin Receptor 2
785	TAP1	Transporter 1, ATP Binding Cassette Subfamily B Member
786	TAP2	Transporter 2, ATP Binding Cassette Subfamily B Member
787	TAPBP	TAP Binding Protein
788	TATDN1	TatD DNase Domain Containing 1
789	TCF3	Transcription Factor 3
790	TCF7	Transcription Factor 7
791	TCL1A	T Cell Leukemia/Lymphoma 1A
792	TERT	Telomerase Reverse Transcriptase
793	TF	Transferrin
794	TFAP2A	Transcription Factor AP-2 Alpha
795	TFF1	Trefoil Factor 1
796	TFF3	Trefoil Factor 3
797	TFRC	Transferrin Receptor
798	TGFA	Transforming Growth Factor Alpha
799	TGFB1	Transforming Growth Factor Beta 1
800	TGFB2	Transforming Growth Factor Beta 2
801	TGFB3	Transforming Growth Factor Beta 3
802	TGFBR2	Transforming Growth Factor Beta Receptor 2
803	THBD	Thrombomodulin
804	TIMM8A	Translocase Of Inner Mitochondrial Membrane 8A
805	TIMP1	TIMP Metallopeptidase Inhibitor 1
806	TIMP2	TIMP Metallopeptidase Inhibitor 2
807	TIMP3	TIMP Metallopeptidase Inhibitor 3
808	TINCR	TINCR Ubiquitin Domain Containing
809	TK1	Thymidine Kinase 1
810	TKT	Transketolase
811	TLR2	Toll Like Receptor 2
812	TLR4	Toll Like Receptor 4
813	TLR9	Toll Like Receptor 9
814	TMEM80	Transmembrane Protein 80
815	TMPO	Thymopoietin
816	TMPRSS11D	Transmembrane Serine Protease 11D
817	TNF	Tumor Necrosis Factor
818	TNFRSF10A	TNF Receptor Superfamily Member 10a
819	TNFRSF10B	TNF Receptor Superfamily Member 10b
820	TNFRSF13B	TNF Receptor Superfamily Member 13B
821	TNFRSF13C	TNF Receptor Superfamily Member 13C
822	TNFRSF17	TNF Receptor Superfamily Member 17
823	TNFRSF8	TNF Receptor Superfamily Member 8
824	TNFSF10	TNF Superfamily Member 10
825	TNFSF12	TNF Superfamily Member 12
826	TNFSF13	TNF Superfamily Member 13
827	TNFSF13B	TNF Superfamily Member 13b
828	TOP1	DNA Topoisomerase I
829	TOP2A	DNA Topoisomerase II Alpha
830	TP53BP1	Tumor Protein P53 Binding Protein 1
831	TP53COR1	Tumor Protein P53 Pathway Corepressor 1
832	TP53TG1	TP53 Target 1
833	TP63	Tumor Protein P63
834	TP73	Tumor Protein P73
835	TP73-AS1	TP73 Antisense RNA 1
836	TPSAB1	Tryptase Alpha/Beta 1
837	TPSB2	Tryptase Beta 2 (Gene/Pseudogene)
838	TRAF3	TNF Receptor Associated Factor 3
839	TRIM29	Tripartite Motif Containing 29
840	TRPM2-AS	TRPM2 Antisense RNA
841	TRPV1	Transient Receptor Potential Cation Channel Subfamily V Member 1
842	TSLP	Thymic Stromal Lymphopoietin
843	TSPAN4	Tetraspanin 4
844	TTF2	Transcription Termination Factor 2
845	TTR	Transthyretin
846	TUBA4B	Tubulin Alpha 4b
847	TUBB	Tubulin Beta Class I
848	TUG1	Taurine Up-Regulated 1
849	TUSC2	Tumor Suppressor 2, Mitochondrial Calcium Regulator
850	TUSC7	Tumor Suppressor Candidate 7
851	TXN	Thioredoxin
852	TYMP	Thymidine Phosphorylase
853	TYMS	Thymidylate Synthetase
854	UBE2N	Ubiquitin Conjugating Enzyme E2 N
855	UCA1	Urothelial Cancer Associated 1
856	UCHL1	Ubiquitin C-Terminal Hydrolase L1
857	URAHP	Urate (Hydroxyiso-) Hydrolase, Pseudogene
858	VAMP7	Vesicle Associated Membrane Protein 7
859	VAV1	Vav Guanine Nucleotide Exchange Factor 1
860	VCP	Valosin Containing Protein
861	VEGFC	Vascular Endothelial Growth Factor C
862	VEGFD	Vascular Endothelial Growth Factor D
863	VIP	Vasoactive Intestinal Peptide
864	VIPR1	Vasoactive Intestinal Peptide Receptor 1
865	VIPR2	Vasoactive Intestinal Peptide Receptor 2
866	VPREB1	V-Set Pre-B Cell Surrogate Light Chain 1
867	VWF	Von Willebrand Factor
868	WDR48	WD Repeat Domain 48
869	WFDC2	WAP Four-Disulfide Core Domain 2
870	WRN	WRN RecQ Like Helicase
871	XDH	Xanthine Dehydrogenase
872	XIAP	X-Linked Inhibitor Of Apoptosis
873	XIST	X Inactive Specific Transcript
874	XRCC1	X-Ray Repair Cross Complementing 1
875	XRCC3	X-Ray Repair Cross Complementing 3
876	XRCC5	X-Ray Repair Cross Complementing 5
877	ZAP70	Zeta Chain Of T Cell Receptor Associated Protein Kinase 70
878	ZBTB24	Zinc Finger And BTB Domain Containing 24
879	ZCRB1	Zinc Finger CCHC-Type And RNA Binding Motif Containing 1
880	ZEB2-AS1	ZEB2 Antisense RNA 1
881	ZFAS1	ZNFX1 Antisense RNA 1
882	ZMYND10	Zinc Finger MYND-Type Containing 10
883	ZNF17	Zinc Finger Protein 17
884	ZNF461	Zinc Finger Protein 461
885	ZNF793	Zinc Finger Protein 793
886	ZNRD1ASP	Zinc Ribbon Domain Containing 1 Antisense, Pseudogene

## Sheet: Schedule 5
NO.	Uniprot ID	Gene symbol	Description
1	P08183	ABCB1	ATP-binding cassette sub-family B member 1
2	P33527	ABCC1	ATP-binding cassette sub-family C member 1
3	Q9UNQ0	ABCG2	ATP-binding cassette sub-family G member 2
4	P12821	ACE	Angiotensin-converting enzyme
5	P78536	ADAM17	Disintegrin and metalloproteinase domain-containing protein 17
6	P07550	ADRB2	Beta-2 adrenergic receptor
7	P35869	AHR	Aryl hydrocarbon receptor
8	O60218	AKR1B10	Aldo-keto reductase family 1 member B10
9	Q9UM73	ALK	Anaplastic lymphoma kinase
10	P16050	ALOX15	Arachidonate 15-lipoxygenase
11	P09917	ALOX5	Arachidonate 5-lipoxygenase
12	P05067	APP	Amyloid-beta precursor protein
13	Q07812	BAX	Apoptosis regulator BAX
14	Q07817	BCL2L1	Bcl-2-like protein 1
15	O15392	BIRC5	Baculoviral IAP repeat-containing protein 5
16	P38398	BRCA1	Breast cancer type 1 susceptibility protein
17	Q06187	BTK	Tyrosine-protein kinase BTK
18	Q16790	CA9	Carbonic anhydrase 9
19	Q14790	CASP8	Caspase-8
20	P55211	CASP9	Caspase-9
21	P14635	CCNB1	G2/mitotic-specific cyclin-B1
22	P24385	CCND1	G1/S-specific cyclin-D1
23	P24864	CCNE1	G1/S-specific cyclin-E1
24	P29016	CD1B	T-cell surface glycoprotein CD1b
25	P28907	CD38	ADP-ribosyl cyclase/cyclic ADP-ribose hydrolase 1
26	P07766	CD3E	T-cell surface glycoprotein CD3 epsilon chain
27	P29965	CD40LG	CD40 ligand
28	P60033	CD81	CD81 antigen
29	P06493	CDK1	Cyclin-dependent kinase 1
30	P24941	CDK2	Cyclin-dependent kinase 2
31	P11802	CDK4	Cyclin-dependent kinase 4
32	Q00534	CDK6	Cyclin-dependent kinase 6
33	P38936	CDKN1A	Cyclin-dependent kinase inhibitor 1
34	O15519	CFLAR	CASP8 and FADD-like apoptosis regulator
35	P13569	CFTR	Cystic fibrosis transmembrane conductance regulator
36	P21554	CNR1	Cannabinoid receptor 1
37	P08311	CTSG	Cathepsin G
38	P04839	CYBB	Cytochrome b558 subunit beta
39	P04798	CYP1A1	Cytochrome P450 1A1
40	Q16678	CYP1B1	Cytochrome P450 1B1
41	P33261	CYP2C19	Cytochrome P450 2C19
42	P10635	CYP2D6	Cytochrome P450 2D6
43	P08684	CYP3A4	Cytochrome P450 3A4
44	P53355	DAPK1	Death-associated protein kinase 1
45	P00374	DHFR	Dihydrofolate reductase
46	P27487	DPP4	Dipeptidyl peptidase 4
47	Q01094	E2F1	Transcription factor E2F1
48	P04626	ERBB2	Receptor tyrosine-protein kinase erbB-2
49	O75460	ERN1	Serine/threonine-protein kinase/endoribonuclease IRE1
50	Q92731	ESR2	Estrogen receptor beta
51	P00734	F2	Coagulation factor II
52	P06734	FCER2	Low affinity immunoglobulin epsilon Fc receptor
53	P09038	FGF2	Fibroblast growth factor 2
54	P36888	FLT3	Receptor-type tyrosine-protein kinase FLT3
55	P02751	FN1	Fibronectin
56	P11413	G6PD	Glucose-6-phosphate 1-dehydrogenase
57	P47869	GABRA2	Gamma-aminobutyric acid receptor subunit alpha-2
58	P09488	GSTM1	Glutathione S-transferase Mu 1
59	P28161	GSTM2	Glutathione S-transferase Mu 2
60	P09211	GSTP1	Glutathione S-transferase P
61	P08236	GUSB	Beta-glucuronidase
62	Q92769	HDAC2	Histone deacetylase 2
63	Q16665	HIF1A	Hypoxia-inducible factor 1-alpha
64	P09601	HMOX1	Heme oxygenase 1
65	P07900	HSP90AA1	Heat shock protein HSP 90-alpha 1
66	P08238	HSP90AB1	Heat shock protein HSP 90-beta
67	P04792	HSPB1	Heat shock protein beta-1
68	P05362	ICAM1	Intercellular adhesion molecule 1
69	P01579	IFNG	Interferon gamma
70	P08069	IGF1R	Insulin-like growth factor 1 receptor
71	O14920	IKBKB	Inhibitor of nuclear factor kappa-B kinase subunit beta
72	P22301	IL10	Interleukin-10
73	P35225	IL13	Interleukin-13
74	P01584	IL1B	Interleukin-1B
75	P60568	IL2	Interleukin-2
76	P05112	IL4	Interleukin-4
77	P05231	IL6	Interleukin-6
78	P06756	ITGAV	Integrin alpha-V
79	P05412	JUN	Transcription factor AP-1
80	P06870	KLK1	Kallikrein-1
81	P09960	LTA4H	Leukotriene A-4 hydrolase
82	P21397	MAOA	Monoamine oxidase type A
83	P27338	MAOB	Monoamine oxidase type B
84	P28482	MAPK1	Mitogen-activated protein kinase 1
85	Q16539	MAPK14	Mitogen-activated protein kinase 14
86	P27361	MAPK3	Mitogen-activated protein kinase 3
87	P45983	MAPK8	Mitogen-activated protein kinase 8
88	Q07820	MCL1	Induced myeloid leukemia cell differentiation protein Mcl-1
89	Q00987	MDM2	E3 ubiquitin-protein ligase Mdm2
90	P08581	MET	Hepatocyte growth factor receptor
91	P08473	MME	Neprilysin
92	P03956	MMP1	Matrix metalloproteinase-1
93	P39900	MMP12	Matrix metalloproteinase-12
94	P45452	MMP13	Matrix metalloproteinase-13
95	P08253	MMP2	Matrix metalloproteinase-2
96	P08254	MMP3	Matrix metalloproteinase-3
97	P22894	MMP8	Matrix metalloproteinase-8
98	P14780	MMP9	Matrix metalloproteinase-9
99	Q01362	MS4A2	Membrane-spanning 4-domains subfamily A member 2
100	P19838	NFKB1	Nuclear factor NF-kappa-B p105 subunit
101	Q00653	NFKB2	Nuclear factor NF-kappa-B p100 subunit
102	P25963	NFKBIA	NF-kappa-B inhibitor alpha
103	P35228	NOS2	Nitric oxide synthase type II
104	P29474	NOS3	Nitric oxide synthase type III
105	Q6W5P4	NPSR1	Neuropeptide S receptor
106	P04150	NR3C1	Nuclear receptor subfamily 3 group C member 1
107	P11926	ODC1	Ornithine decarboxylase
108	P41145	OPRK1	Kappa-type opioid receptor-1
109	OXSR1	OPRM1	Mu-type opioid receptor-1
110	P09874	PARP1	Poly [ADP-ribose] polymerase 1
111	P12004	PCNA	Proliferating cell nuclear antigen
112	Q08499	PDE4D	cAMP-specific 3',5'-cyclic phosphodiesterase 4D
113	P48736	PIK3CG	Phosphatidylinositol 4,5-bisphosphate 3-kinase catalytic subunit gamma isoform
114	P00749	PLAU	Urokinase-type plasminogen activator, U-plasminogen activator
115	P00747	PLG	Plasminogen
116	P37231	PPARG	Peroxisome proliferator-activated receptor gamma
117	P17252	PRKCA	Protein kinase C alpha type
118	O60260	PRKN	E3 ubiquitin-protein ligase parkin
119	P49810	PSEN2	Presenilin-2
120	Q9Y5Y4	PTGDR2	Prostaglandin D2 receptor 2
121	P34995	PTGER1	Prostaglandin E2 receptor EP1 subtype
122	P23219	PTGS1	Prostaglandin G/H synthase 1
123	P35354	PTGS2	Prostaglandin G/H synthase 2
124	Q14289	PTK2B	Protein-tyrosine kinase 2-beta
125	P10826	RARB	Retinoic acid receptor beta
126	Q04206	RELA	Transcription factor p65
127	P23921	RRM1	Ribonucleoside-diphosphate reductase large subunit
128	P16581	SELE	E-selectin
129	P05121	SERPINE1	Plasminogen activator inhibitor 1
130	P03973	SLPI	Secretory leukocyte protease inhibitor
131	P21452	TACR2	Tachykinin receptor 2
132	O14746	TERT	Telomerase reverse transcriptase
133	Q9NR96	TLR9	Toll-like receptor 9
134	O60235	TMPRSS11D	Transmembrane protease serine 11D
135	P01375	TNF	Tumor necrosis factor
136	O14763	TNFRSF10B	Tumor necrosis factor receptor superfamily member 10B
137	P11387	TOP1	DNA topoisomerase 1
138	P11388	TOP2A	DNA topoisomerase 2-alpha
139	O15350	TP73	Tumor protein p73
140	P02766	TTR	Transthyretin
141	P04818	TYMS	Thymidylate synthase
142	P04275	VWF	von Willebrand factor
143	Q14191	WRN	Werner syndrome ATP-dependent helicase
144	P47989	XDH	Xanthine dehydrogenase/oxidase

## Sheet: Schedule 6
Targe-PDB ID	apigenin	caffeic acid	ferulic acid	linoleic acid	luteolin	methyl linolenate	robinin
IL6-1ALU	91.6734	91.5822	81.8546	98.6994	123.417	106.842	101.738
TNF-1A8M	108.033	93.7322	83.1134	116.061	125.099	117.4	90.3342
JUN-1A02	92.3657	73.3737	72.7278	110.085	101.104	108.77	90.737
MAPK3-2ZOQ	98.7907	79.1648	77.5174	105.276	100.493	93.25	0
MAPK1-1PME	93.6696	77.5454	81.9386	104.361	95.8495	108.893	0
PTGS2-5F19	104.73	83.6717	91.9332	117.133	96.0334	94.674	0
MAPK8-1UKH	101.902	86.5105	90.1078	105.133	105.221	94.773	112.47
CCND1-2W96	94.7812	68.0296	73.8229	108.452	94.5464	110.237	119.612
MMP9-1GKC	122.344	94.2463	97.8699	99.945	114.84	109.298	0
HSP90AA1-1BYQ	98.5777	80.5969	79.7535	91.136	105.51	111.787	0
IL10-1ILK	83.005	60.3043	62.3984	90.1086	107.488	92.0111	111.439
FN1-1E88	107.591	75.9311	79.0468	97.999	109.222	111.257	115.144
BCL2L1-1G5J	108.526	80.1917	83.3587	110.699	115.546	95.642	0
IL1B-1ITB	120.484	88.1902	96.5441	118.029	122.521	113.389	90.1432
ERBB2-1MFG	97.7162	79.6796	82.4887	103.975	93.1455	106.046	0
IL4-1CYL	77.6077	102.296	99.3359	97.917	100	95.819	0
CASP8-1F9E	101.737	79.0021	86.3733	110.325	99.3723	97.07	107.803
MAPK14-1A9U	105.571	77.0151	83.5682	95.144	108.119	114.642	110.101
IL2-1ILM	99.9831	76.8347	79.8593	111.065	102.855	100.213	0
MMP2-1CK7	96.7748	72.402	62.0926	104.174	109.391	104.426	124.947
